# Supplementary material for: Effects of exergames training on postural balance in patients who had a chronic stroke: study protocol for a randomised controlled trial
Source: PubMed Central journal article supplement — BMJ Open. 2020 Nov 4;10(11):e038593. doi: 10.1136/bmjopen-2020-038593 (PMC7643507; doi:10.1136/bmjopen-2020-038593), 2020-11-04
Supplement: bmjopen-2020-038593.draft_revisions.pdf [file bmjopen-2020-038593.draft_revisions.pdf]

# BMJ Open

BMJ Open is committed to open peer review. As part of this commitment we make the peer review history of every article we publish publicly available.

When an article is published we post the peer reviewers' comments and the authors' responses online. We also post the versions of the paper that were used during peer review. These are the versions that the peer review comments apply to.

The versions of the paper that follow are the versions that were submitted during the peer review process. They are not the versions of record or the final published versions. They should not be cited or distributed as the published version of this manuscript.

BMJ Open is an open access journal and the full, final, typeset and author-corrected version of record of the manuscript is available on our site with no access controls, subscription charges or pay-per-view fees (<http://bmjopen.bmj.com>).

If you have any questions on BMJ Open's open peer review process please email [info.bmjopen@bmj.com](mailto:info.bmjopen@bmj.com)

# BMJ Open

## Effects of exergames training on Postural Balance in chronic stroke patients: study protocol for a randomized controlled trial

|                               |                                                                                                                                                                                                                                                                                                                                                                                                                                                                                                                                                                   |
|-------------------------------|-------------------------------------------------------------------------------------------------------------------------------------------------------------------------------------------------------------------------------------------------------------------------------------------------------------------------------------------------------------------------------------------------------------------------------------------------------------------------------------------------------------------------------------------------------------------|
| Journal:                      | <i>BMJ Open</i>                                                                                                                                                                                                                                                                                                                                                                                                                                                                                                                                                   |
| Manuscript ID                 | bmjopen-2020-038593                                                                                                                                                                                                                                                                                                                                                                                                                                                                                                                                               |
| Article Type:                 | Protocol                                                                                                                                                                                                                                                                                                                                                                                                                                                                                                                                                          |
| Date Submitted by the Author: | 16-Mar-2020                                                                                                                                                                                                                                                                                                                                                                                                                                                                                                                                                       |
| Complete List of Authors:     | Bessa, Nathalia; UFRN, Lima Filho, Bartolomeu; Federal University of Rio Grande do Norte, Department of Physical Therapy<br>Medeiros, Candice; Federal University of Rio Grande do Norte, Department of Physical Therapy<br>Ribeiro, Tatiana; Federal University of Rio Grande do Norte, Department of Physical Therapy; Federal University of Rio Grande do Norte<br>Campos, Tânia; Federal University of Rio Grande do Norte, Department of Physical Therapy<br>Cavalcanti, Fabrícia; Federal University of Rio Grande do Norte, Department of Physical Therapy |
| Keywords:                     | Stroke < NEUROLOGY, REHABILITATION MEDICINE, Neurology < INTERNAL MEDICINE                                                                                                                                                                                                                                                                                                                                                                                                                                                                                        |
|                               |                                                                                                                                                                                                                                                                                                                                                                                                                                                                                                                                                                   |

SCHOLARONE™  
Manuscripts

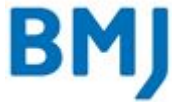

I, the Submitting Author has the right to grant and does grant on behalf of all authors of the Work (as defined in the below author licence), an exclusive licence and/or a non-exclusive licence for contributions from authors who are: i) UK Crown employees; ii) where BMJ has agreed a CC-BY licence shall apply, and/or iii) in accordance with the terms applicable for US Federal Government officers or employees acting as part of their official duties; on a worldwide, perpetual, irrevocable, royalty-free basis to BMJ Publishing Group Ltd ("BMJ") its licensees and where the relevant Journal is co-owned by BMJ to the co-owners of the Journal, to publish the Work in this journal and any other BMJ products and to exploit all rights, as set out in our [licence](#).

The Submitting Author accepts and understands that any supply made under these terms is made by BMJ to the Submitting Author unless you are acting as an employee on behalf of your employer or a postgraduate student of an affiliated institution which is paying any applicable article publishing charge ("APC") for Open Access articles. Where the Submitting Author wishes to make the Work available on an Open Access basis (and intends to pay the relevant APC), the terms of reuse of such Open Access shall be governed by a Creative Commons licence – details of these licences and which [Creative Commons](#) licence will apply to this Work are set out in our licence referred to above.

Other than as permitted in any relevant BMJ Author's Self Archiving Policies, I confirm this Work has not been accepted for publication elsewhere, is not being considered for publication elsewhere and does not duplicate material already published. I confirm all authors consent to publication of this Work and authorise the granting of this licence.

1 **Effects of exergames training on Postural Balance in chronic**  
2 **stroke patients: study protocol for a randomized controlled trial**

3  
4 Nathalia Priscilla Oliveira Silva Bessa<sup>1</sup>; Bartolomeu Fagundes de Lima Filho<sup>1</sup>;  
5 Candice Simões Pimenta de Medeiros<sup>1</sup>; Tatiana Souza Ribeiro<sup>1</sup>; Tânia  
6 Fernandes Campos<sup>1</sup>; Fabricia Azevedo da Costa Cavalcanti<sup>1</sup>.

7  
8 <sup>1</sup> Department of Physical Therapy, Federal University of Rio Grande do Norte,  
9 Natal, Brazil.

10  
11 \*Corresponding author: Nathalia Priscilla Oliveira Silva Bessa. Laboratory of  
12 Virtual Reality, Department of Physical Therapy, Federal University of Rio  
13 Grande do Norte, Senador Salgado Filho Av, 3000, Natal, Rio Grande do Norte,  
14 Brazil. Email: [nathyzinhasilva@gmail.com](mailto:nathyzinhasilva@gmail.com)

15  
16 **Date:** 11 March 2020

17  
18 **Version:** 1

19  
20 **Word Count:** 3994

1  
2  
3 **Abstract**  
4

5  
6 **Introduction:** Exergames training, as an additional therapy to standard care,  
7  
8 has been widely used for motor recovery after stroke. However, there is  
9  
10 insufficient evidence to reach conclusions about the isolated effectiveness of  
11  
12 exergames on gait speed, balance, and the quality of life compared to that of  
13  
14 traditional rehabilitation training. The study describes a single-blind randomized  
15  
16 clinical trial that aim is to investigate the effects of exergames training on  
17  
18 postural balance in patients with chronic stroke.  
19  
20

21  
22 **Methods and analysis:** Forty-two individuals with chronic stroke (> 6 months),  
23  
24 aged from 20 to 75 years, will be randomized into two groups: experimental  
25  
26 group, which will be submitted to an exergames protocol and control group  
27  
28 which will undergo kinesiotherapy protocol, both protocols are based on  
29  
30 postural balance. The intervention will consist of 40-minute sessions twice a  
31  
32 week for 10 consecutive weeks. The volunteers will be evaluated before the  
33  
34 treatment, at the end of the interventions and 8 weeks after. The primary  
35  
36 outcome will be postural balance, and secondary outcomes will be gait, cortical  
37  
38 activation patterns, functional independence, quality of life, and motivation.

39  
40 **Ethics and dissemination:** This protocol has been approved by the Ethics  
41  
42 Committee of Federal University of Rio Grande do Norte (number: 3.434.350).  
43  
44 The results of the study will be disseminated to participants through social  
45  
46 networks and will be submitted to a peer-reviewed journal and scientific  
47  
48 meetings.  
49  
50

51  
52 **Trial registration number :** RBR-78v9hx (Brazilian Registry of Clinical Trials –  
53  
54 ReBEC).  
55  
56  
57  
58  
59  
60

1  
2  
3 46 **Keywords:** Stroke, Randomised Controlled Trial, Postural balance,  
4  
5 47 Rehabilitation, Physical therapy modalities, Virtual Reality Exposure Therapy.  
6  
7  
8  
9

10 49 **Strengths and limitations of this study**

- 11  
12 50 • This study will be explore objective data of the postural balance and gait  
13  
14 51 through the force platform and kinematic analysis;  
15  
16  
17 52 • This study is among the few that use EEG to assess brain activity in  
18  
19 53 stroke individuals undergoing in an experimental protocol with  
20  
21 54 exergames;  
22  
23  
24 55 • The results of this research can lead to enhancements about how to  
25  
26 56 improve the use of exergames for postural balance in the stroke  
27  
28 57 rehabilitation;  
29  
30  
31 58 • This study should benefit participants not only in physical aspects but  
32  
33 59 also in psychological and social aspects;  
34  
35  
36 60 • The blinding of participants will be not possible because the nature of the  
37  
38 61 intervention;  
39  
40  
41  
42  
43  
44  
45  
46  
47  
48  
49  
50  
51  
52  
53  
54  
55  
56  
57  
58  
59  
60

## 63 Introduction

64 According to the World Health Organization, cerebrovascular disease  
65 was the leading cause of death worldwide in 2016. Of those deaths, 5.78 million  
66 were directly attributed to stroke, making it the main non-communicable cause  
67 of death<sup>1</sup>. In Brazil, stroke resulted in approximate 100,000 deaths in 2014<sup>2</sup>, and  
68 data indicate that about 568,000 affected individuals suffer from severe  
69 disability, making stroke the leading cause of disability in adults<sup>3</sup>.

70 Following stroke, various aspects of balance function are altered, such as  
71 delay in regaining the ability to assume the standing posture, loss of balance,  
72 asymmetry between the right and left limbs, increased posture sway, and  
73 decreased weight bearing on the affected side<sup>4,5</sup>. Postural balance is important  
74 for functional tasks such as sitting, sit-to-stand, and walking, and dysfunction  
75 leads to alterations in weight distribution patterns, causing the paretic leg to  
76 take less load<sup>6</sup>. These changes promote high risk of falling, difficulties in  
77 executing functional activities and reduced performance of daily living activities,  
78 and a consequent reduction in social participation which can aggravate the  
79 clinical situation<sup>7</sup>.

80 Underuse of the impaired limb results in suppression of the cortical  
81 representation of the affected limb and further inhibition of its use<sup>8</sup>. The  
82 existence of cortical neural resources specialized in capturing changes in  
83 postural stability, which have been detected by changes in  
84 electroencephalography (EEG), support the idea that postural adjustments are  
85 not only due to muscle responses to disorders but also due to cortically  
86 controlled intentional movements that may be altered following stroke<sup>9</sup>.

1  
2  
3 87 One major component of stroke rehabilitation is exercise therapy<sup>10</sup> and  
4  
5 88 motor skill learning is particularly attractive since practice-induced improvement  
6  
7  
8 89 of sensorimotor performance supports the development of new aptitudes,  
9  
10 90 providing the flexibility to adapt to changing conditions<sup>11</sup>.

11  
12 91 These perspective, virtual reality (VR)-based exercises, also known as  
13  
14 92 exergames, have been widely used in rehabilitation with the aim of improving  
15  
16  
17 93 sensorial, cognitive, psychological, and motor function<sup>12,13</sup>. They have been  
18  
19 94 characterized as an experience that simulates a real environment in which the  
20  
21  
22 95 user can interact with the scenario created by the game through the  
23  
24 96 involvement of multisensory aspects<sup>14</sup>. Exergames applications have the  
25  
26 97 potential to apply relevant concepts of neuroplasticity, such as repetition,  
27  
28 98 intensity, and task-oriented training of the paretic extremity<sup>7</sup>, and may entrain  
29  
30  
31 99 several brain areas involved in motor planning and learning, thus leading to an  
32  
33 100 enhanced motor performance in rehabilitation<sup>12,15,16</sup>.

34  
35 101 There is some evidence to suggest the effectiveness of exergames in  
36  
37 102 improving upper limb function and balance as an additional therapy to standard  
38  
39  
40 103 care in stroke patients. However, there is insufficient evidence to reach  
41  
42 104 conclusions about the isolated effectiveness of exergames on gait speed,  
43  
44 105 balance, participation, or the quality of life compared to that of traditional  
45  
46 106 rehabilitation training<sup>17,18</sup>.

47  
48  
49 107 A meta-analysis by Lee *et al.* (2019) found moderate evidence to support  
50  
51 108 the effect of exergames training on improved lower limb function, including  
52  
53 109 balance and gait, to a similar degree as upper limb function in chronic stroke  
54  
55  
56 110 patients, suggesting that this technique may be used as a complementary  
57  
58 111 treatment method alongside traditional rehabilitation therapy. However, most of  
59  
60



1  
2  
3 112 the studies in this meta-analysis increased the overall treatment time by adding  
4  
5 113 exergames training to conventional treatment, and this may be the reason for  
6  
7  
8 114 the observed outcomes<sup>19</sup>.

9  
10 115 Considering the above evidence, it is paramount to investigate the  
11  
12 116 isolated effectiveness of exergames rehabilitation and its contributions to  
13  
14 117 positive changes in postural balance in stroke patients as this may provide  
15  
16  
17 118 additional evidence for the rehabilitation process in this population. The  
18  
19 119 proposal of the study is to investigate the effects of exergames training on  
20  
21 120 postural balance in patients with chronic stroke and to explore changes in  
22  
23  
24 121 cortical activation patterns, functionality, quality of life, and motivation.

25  
26 122

## 27 28 123 **Methods and Analysis**

### 29 30 124 **Design**

31  
32  
33 125 A single-blind randomized controlled clinical trial that follows the  
34  
35 126 recommendations of the Standard Protocol Items: Recommendations for  
36  
37 127 Interventional Trials (SPIRIT)<sup>20</sup> (Figure 1) . Participants will be randomised to  
38  
39 128 receive exergames protocol (experimental group - EG) and kinesiotherapy  
40  
41 129 protocol (control group - CG) (Figure 2).

42  
43  
44  
45 130 **[INSERT Image 1]**

46 131 **[INSERT Image 2]**

47 132

### 48 49 133 **Participants**

50  
51 134 The study population will consist of forty-two chronic stroke patients who  
52  
53 135 live in the city of Natal or nearby. A volunteer selection will be carried out in  
54  
55 136 stroke patient care centers in the city. The selection can also be carried out via  
56  
57  
58 137 spontaneous demand by the voluntary search of stroke patients after project  
59  
60

1  
2  
3 138 advertisement on social media. After this, the first telephone contact will be  
4  
5 139 made to clarify any questions from the participants, and the first screening for  
6  
7 140 inclusion will be performed.  
8  
9

10 141

## 12 142 **Inclusion and exclusion criteria**

14 143 The participants will be selected according to the following criteria: (1)  
16 144 first episode of unilateral stroke (ischemic or hemorrhagic); (2) postural balance  
18 145 deficits (Berg Balance Scale score -BBS)  $<45$ <sup>21</sup>; (3) injury time  $\geq 6$  months; (4)  
20 146 age between 20 and 75 years; (5) at maximum level 2 of the modified Ashworth  
22 147 Scale to assess the spasticity of the paretic lower limb<sup>22</sup>; (6) good cognitive  
24 148 status based on the Mini-Mental State Examination (MMSE)<sup>23</sup>; (7) ability to walk  
26 149 without personal assistance indoors (Functional Ambulation Category -FAC)  
28 150 scores  $\geq 3$ <sup>24</sup>; (8) clinically stable, with no history of epilepsy or seizures in the  
30 151 last 6 months; (9) not having signs of unilateral neglect or sensory or global  
32 152 aphasia as assessed by National Institute Health Stroke Scale -NIHSS<sup>25</sup>; (10)  
34 153 no uncorrected hearing and/or visual impairments; (11) not participating in a  
36 154 balance treatment protocol; and (12) ability to understand and obey simple  
38 155 motor commands.  
40  
42  
43

44 156 Exclusion criteria will include (1) presenting other clinical conditions  
46 157 affecting balance and (2) pregnancy.  
48

49 158

## 51 159 **Sample Size**

53 160 Using an online calculator<sup>26</sup> and based on previous study values  
55 161 ( $51.0 \pm 4.6$  and  $46.2 \pm 5.7$ )<sup>27</sup> a total sample of participants 42 (21 in EG and 21 in  
57 162 CG) will be sufficient to detect a clinically important difference between the  
59  
60

1  
2  
3 163 groups on the BBS. A statistical power of 80% and an alpha of 5% and a loss  
4  
5 164 rate of 10% were considered for the sample calculation.  
6  
7  
8 165

9  
10 166 **Randomization and blinding**  
11

12  
13 167 A randomization sequence will be generated by a computer<sup>28</sup> in 3 blocks  
14  
15 168 of 12 participants and 1 block of 6 participants, allowing participants to be  
16  
17 169 equally distributed between the 2 groups. This stage will be conducted by a  
18  
19 170 researcher, not involved in the study, which will keep the randomization list  
20  
21 171 confidential until the end of the study and will organize the allocation in  
22  
23 172 sequentially numbered opaque envelopes. These envelopes will be sealed, and  
24  
25 173 the randomization sequence will be enforced using color coding for the study  
26  
27 174 groups (blue and red) that will correspond to the protocol that will be executed.  
28  
29 175 The contents of each envelope will be revealed at the beginning of each  
30  
31 176 patient's training by the study therapists responsible for the intervention to  
32  
33 177 maintain allocation confidentiality. The same therapists involved in CG training  
34  
35 178 will perform training in the EG. The researcher responsible for evaluations will  
36  
37 179 be blinded to all intervention groups. The only variables that will be collected  
38  
39 180 during the training will be evaluated by study therapists (non-blind). Statistical  
40  
41 181 analysis will be performed by a blind researcher who will treat the groups  
42  
43 182 according to color and the equivalence between groups and colors will be  
44  
45 183 revealed upon completion of the statistical analysis. The main researcher  
46  
47 184 (assessment) will have access to the final trial dataset; this researcher will  
48  
49 185 decide terminate the trial. All information about participants will be confidentiality  
50  
51 186 before, during and after the trial.  
52  
53  
54  
55  
56  
57  
58  
59 187  
60

## 188 **Evaluation procedures**

189 The researchers will be trained before data collection procedures to  
190 ensure the reliability of measurements and the participants will be submitted to  
191 assessment using all the instruments mentioned bellow.

## 193 **Measures**

### 194 **Sample characterization measures**

- 195 • Cognition: MMSE is a validated instrument in Brazil to assess cognitive  
196 function. The total score ranges from 0 to 30 points, and the higher the  
197 score, the better the cognitive ability, according to education. Good  
198 cognitive status is considered with scores equal to or higher than 24  
199 points for literate persons and 19 for illiterate persons<sup>23</sup>.
- 200 • Ability to walk: This will be evaluated by the FAC which is a sensitive and  
201 reliable instrument for gait evaluation in stroke patients with  
202 hemiparesis<sup>24</sup> and ranks the ability to walk according to the amount of  
203 physical support required for the task. The score can vary from 0 (unable  
204 to walk or needs the help of 2 therapists) to 5 (independent in  
205 locomotion).
- 206 • Spasticity: The modified Ashworth scale allows subjective assessment of  
207 muscle tone and classifies the affected segments from 0 (normal tone) to  
208 5 (rigid affected part)<sup>22</sup>.
- 209 • Clinical and demographic data: Personal information, anthropometric  
210 data, demographic partner and pathological (injury time, paretic side,  
211 stroke type) and clinical history (history of falls, physical therapy  
212 treatment, and previous use of exergames) will be collected.

- 1  
2  
3 213 • Neurological impairment: NIHSS is a specific instrument to assess the  
4  
5 214 severity of stroke via 10 items and is reported to have excellent validity  
6  
7 215 and reliability<sup>25</sup>.  
8  
9

10 216

11  
12 217 **Outcome measures**

13  
14 218 Primary outcome measures considered for this study are as follows:

15  
16  
17 219 **Postural Balance:**

- 18  
19 220 • Berg Balance Scale: BBS is a valid and reliable instrument for measuring  
20  
21 221 both the static and dynamic aspects of balance in people after stroke.  
22  
23 222 BBS scores range from 0 to 56, and values below 45 points are  
24  
25 223 predictive of falls, indicating a significant change in balance<sup>21,29</sup>. In the  
26  
27 224 present study, test scores with the paretic limb positioned behind will be  
28  
29 225 used in item 13 and unipodal support over the paretic limb will be used in  
30  
31 226 item 14, minimizing the ceiling effect in individuals with better balance<sup>30</sup>.  
32  
33 227 • Functional Reach Test (FRT): FRT assesses a patient's stability by  
34  
35 228 measuring the maximum distance an individual can reach forward while  
36  
37 229 standing in a fixed position, as is widely used to identify the risk of  
38  
39 230 falling<sup>31</sup>. Displacements < 15 cm indicate patient fragility and risk of  
40  
41 231 falls<sup>32</sup>.  
42  
43 232 • Timed up and Go test (TUG): It is a valid instrument for assessing  
44  
45 233 mobility and functional balance involving power, speed, and agility<sup>33</sup>.  
46  
47 234 Performing the test within 10 seconds is considered normal for healthy,  
48  
49 235 independent adults without the risk of falls. Values from 11 to 20 seconds  
50  
51 236 are expected for disabled or frail elderly people with partial independence  
52  
53  
54  
55  
56  
57  
58  
59  
60

237 and a low risk of falls. Values > 20 seconds suggests that the elderly  
238 have significant physical mobility deficits and risk of falls<sup>34</sup>.

239 • Centre of Pressure variables (CoP): Data for total displacement,  
240 anteroposterior, and midlateral velocity of the CoP will be assessed using  
241 the gold standard equipment for balance assessment, the force platform  
242 (FP)<sup>35</sup>. The Bertec® model 4060 connected to an external amplifier  
243 (Bertec® AM651X) will be used.

245 The following secondary outcome measures are considered for this study:

#### 247 **Cortical Activation Pattern**

248 Alpha and beta frequencies will be evaluated due to their relationship  
249 with the motor learning process<sup>36</sup>, using the Emotiv EPOC®, portable 14 sensor  
250 electroencephalography (EEG) device, gyroscope capable of detecting changes  
251 in the movement performed.

#### 253 **Gait kinematic analysis**

254 The spatiotemporal and angular gait variables will be evaluated by the 6-m  
255 timed walk test and Kinovea® software.

256 • Six-Meter Timed Walk (6MTW): It is a valid and reliable test for the  
257 assessment of the walking ability of patients with stroke<sup>37</sup>. Gait speed  
258 should be self-selected and considered comfortable and usual for the  
259 participant. Studies show variation in mean habitual speed (0.45 m/s -  
260 0.78 m/s) of gait in individuals with hemiparesis<sup>38,39</sup>.

- 1  
2  
3 261 • Software Kinovea®: Kinematic evaluation will be performed during gait  
4  
5 262 video capture (6MTW) using the Sony DCR-DVD850 digital cam, 2.7/6.7  
6  
7 263 cm LCD screen, 60x optical zoom. Data will later be exported to  
8  
9 264 Kinovea® 0.8.15 software for paretic lower limb angle and gait speed  
10  
11 265 analysis. This is public domain video editing and analysis software that is  
12  
13 266 valid, reliable, and capable of accurately measuring distances up to 5  
14  
15 267 meters from the object<sup>40</sup>.  
16  
17  
18  
19  
20

### 21 269 **Functional independence**

22  
23  
24 270 The Functional Independence Measure (FIM) scale will be used due to  
25  
26 271 its reliability, validity, precision, and feasibility criteria. It is composed of 18 items  
27  
28 272 including motor and cognitive items, in a system where the patient's answers  
29  
30 273 graduates from 1 (total dependent) to 7 (complete independence) and the total  
31  
32 274 punctuation ranges between 18 and 126. For this research, the FIM will be  
33  
34 275 applied exclusively to the motor items, limiting the minimum score to 13 and the  
35  
36 276 maximum to 91 points<sup>41</sup>.  
37  
38  
39  
40  
41

### 42 278 **Quality of life**

43  
44 279 The assessment of quality-of-life perception will be performed through a  
45  
46 280 quality-of-life assessment scale in stroke (Stroke-Specific Quality of Life Scale  
47  
48 281 [SS-QoL]). It is valid and reliable in assessing the quality of life after stroke in  
49  
50 282 the Brazilian population and has 49 items distributed over 12 domains<sup>42</sup>.  
51  
52  
53  
54  
55

### 56 284 **Motivation**

57  
58  
59  
60

1  
2  
3 285 Intrinsic Motivation Inventory (IMI) is a multidimensional measurement  
4  
5 286 with 6 subscales used to assess the subjective experiences of participants  
6  
7 287 when developing an activity and attends to the reliability, validity criteria.  
8  
9  
10 288 According to the inventory, instruction participants ranked their agreement with  
11  
12 289 each statement on a Likert scale of 1 (“not at all true”) to 7 (“very true”)<sup>43</sup>.  
13  
14  
15 290

### 17 291 **Participant monitoring measures**

19 292 Participants will be monitored during interventions by the following measures:

- 21 293 • Cardiovascular parameter variables: Heart rate (HR) will be checked by  
22 294 portable oximeter and Blood pressure (BP) by sphygmomanometer  
23 295 (Visomat Comfort III®, Incoterm, São Paulo, Brazil) on the non-paretic arm.
- 24 296 • Adverse symptoms, perceived effort, and pain: Information regarding  
25 297 headache, vomiting, and dizziness will be collected. Quantification of  
26 298 perceived effort and pain will be used as indicators to monitor exercise  
27 299 tolerance through the CR-10 (Category-Ratio Scale) Borg Scale<sup>44</sup> modified  
28 300 by Foster *et al.*<sup>45</sup> (2001).  
29  
30  
31  
32  
33  
34  
35  
36  
37  
38  
39  
40  
41

### 42 302 **Adverse events**

43  
44 303 Additional information such as hospitalizations, falls, out-of-routine  
45 304 medical consultation, medication change, new diagnosis, and presence of  
46 305 negative event will be collected during the follow-up.  
47  
48  
49  
50  
51  
52  
53

### 54 307 **Interventions**

55  
56 308 The protocols in both groups will be performed individually through 40-  
57 309 minute sessions twice a week for 10 weeks (total of 20 sessions), totaling 13  
58  
59  
60



hours of intervention<sup>12,17,46</sup>. The same outcome measures and motivation will be collected again at the end of the interventions (post-training) and after 8 weeks of the end of the interventions (follow-up). All participants will be instructed not to perform any other physical activity that works on body balance during the study period.

During each session, the absences, manifestations of adverse symptoms, and occurrence of imbalance and/or falls will be recorded. Interventions modifications will be performed according patient's level of adaptation involving optimization of time or number of repetitions; and/or rest time enlargement and all will be registered.

Both groups will begin their protocols with adapted lower limb strength training for 10 minutes<sup>47,48</sup> as described in Table 1. Each exercise should be performed with respect to the patient's level of adaptation and evolution will occur in the 6th and 13th sessions using the materials described.

**Table 1.** Lower limb strengthening exercises.

| Exercise                          | Evolution                            | Materials Used                                                       | Sets                                         |
|-----------------------------------|--------------------------------------|----------------------------------------------------------------------|----------------------------------------------|
| 1. Get up and sit on a chair      | Surface change                       | 1 or 2 mats to create an unstable surface (H: 3 x W: 43 x L: 93 cm). | 2 sets of 60 seconds with 30 seconds of rest |
| 2. Go up and down steps           | Increase the step height; add weight | Larger step and 1 kg shin pad.                                       |                                              |
| 3. Strengthening of hip extensors | Add weight                           | 1 kg and 2 kg shin pad.                                              |                                              |
| 4. Tiptoe rise                    | Add weight                           | 1 kg and 2 kg shin pad.                                              |                                              |

Source: adapted from Allet et al. (2010).

### Control Group

329 Participants in the CG will receive a kinesiotherapy protocol (30 minutes)  
 330 (Table 2) focusing on balance based on previous studies and promotes stimuli  
 331 similar to the EG and were selected so that they demand identical motor  
 332 sensors in both intervention environments, real and virtual<sup>47-50</sup>. Two  
 333 progressions will happen, respectively, in the 6th and 13th sessions.

334

335 **Table 2.** Kinesiotherapeutic protocol exercises.

| Exercise                                             | Evolution                                                                       | Materials Used           | Sets**               |
|------------------------------------------------------|---------------------------------------------------------------------------------|--------------------------|----------------------|
| 1. Gait training on a stable surface.                | Gait training on an unstable surface using mats; addition of shin pads of 1 kg. | Mat* and 1 kg shin pads. | 2 sets of 3 minutes  |
| 2. Laterolateral weight transfer and discharge.      | Addition of 1 and 2 mats respectively.                                          | Mat                      | 3 sets of 60 seconds |
| 3. Anteroposterior weight transfer and discharge.    | Addition of 1 and 2 mats respectively.                                          | Mat                      | 3 sets of 60 seconds |
| 4. Laterolateral cephalic movement with eyes open.   | Same movement with eyes closed.<br>Added an exercise mat.                       | Mat                      | 3 sets of 60 seconds |
| 5. Anteroposterior cephalic movement with eyes open. | Same movement with eyes closed.<br>Added an exercise mat.                       | Mat                      | 3 sets of 60 seconds |
| 6. Dissociation of scapular and pelvic girdles.      | Addition of 1 and 2 mats respectively.                                          | Mat                      | 3 sets of 2 minutes  |

336 Source: Adapted from Nascimento, Patrizzi, Oliveira (2012); Soares, Sachelli (2008);  
 337 Allet et al. (2010) e Ribeiro (2015). Legend: \*The mats (height: 3 x width: 43 x length:  
 338 93 cm) will be used to create an unstable surface; \*\*For each series performed, the  
 339 participant will be entitled to 30 seconds of rest.

340

### 341 **Experimental Group**

342 Participants in the EG will receive a seven Wii Fit Plus exergames on the  
 343 Nintendo Wii® (30 minutes) (Table 3). This will use the Wii Balance Board  
 344 (WBB) accessory, a multimedia projector, the Wii Remote Controller and

345 initially, participants will have a moment to adapt to Nintendo Wii and its  
346 components.

347

348 **Table 3.** Exergames protocol exercises.

| Game              | Description                                                                                                                                                                                                                                         | Progression                                        |
|-------------------|-----------------------------------------------------------------------------------------------------------------------------------------------------------------------------------------------------------------------------------------------------|----------------------------------------------------|
| 1. Free Run       | Control in patient's pocket "marching" on firm surface                                                                                                                                                                                              | Addition of 1 and 2 mats* respectively             |
| 2. Soccer Heading | On WBB; performs anteroposterior and laterolateral weight transfer to virtually "hit" the head on the ball, with an attempt of 180 s and a throw of 80 balls                                                                                        | Addition of 1 and 2 mats respectively              |
| 3. Pinguim Slide  | On WBB; performs laterolateral weight transfer in order to "catch" the largest number of fish, with 3 attempts of 60 s                                                                                                                              | Addition of 1 and 2 mats respectively              |
| 4. Ski Slalom     | On WBB; performs laterolateral weight transfer for the purpose of deflecting obstacles, and anteroposterior weight transfers to control speed while skiing on the mountain, with three 60-s attempts                                                | Addition of 1 and 2 mats respectively              |
| 5. Table Tilt     | On WBB; performs small laterolateral and anteroposterior displacements as a simulation of an unstable board to place the balls inside holes, with 3 attempts of initial 30 s. You gain 20 s every 1 level you reach so that you do not exceed 180 s | Addition of 1 and 2 mats respectively              |
| 6. Free Steps     | Up and down WBB, alternating feet with eyes open for 180 s                                                                                                                                                                                          | Addition of weights of 1 kg and 2 kg, respectively |
| 7. Balance Bubble | On WBB; performs laterolateral and anteroposterior body displacement without the bubble touching the banks of the virtual river for 180 s                                                                                                           | Addition of 1 and 2 mats respectively              |

349 Legend: Each game will be executed for 3 minutes with a rest interval of approximately  
350 1 minute; \*The mats (height: 3 x width: 43 x length: 93 cm) will be used to create an  
351 unstable surface.

352

353 The games were pre-established with a focus on balance and demands

354 similar to that of the kinesiotherapy protocol: saccadic stimulation,

1  
2  
3 355 visuovestibular cephalic movement, proprioceptive stimulus, dynamic balance  
4  
5 356 training, static gait, ankle and hip strategies, fine CoP control, stimulus  
6  
7 357 optokinetic, double task (motor), and motor coordination<sup>51-53</sup>; and all scores  
8  
9 358 obtained in games will be noted. The progressions will happen upon adaptation  
10  
11 359 of the patient, recommending 2 evolutions, respectively, in the 6th and 13th  
12  
13 360 sessions.  
14  
15  
16

17 361

### 19 362 **Adherence**

21 363 Participants will be contacted by telephone to confirm assessment and  
22  
23 364 training sessions to avoid sample loss. Replacement of faults and performed  
24  
25 365 interventions by engaged and motivated professional will be performed to  
26  
27 366 increase adherence. Regardless of the protocol, the criteria for non-adherence  
28  
29 367 will be considered as follows: (1) absence > 30% of the intervention,  
30  
31 368 consecutively and without replacement; (2) presenting persistent pain or severe  
32  
33 369 discomfort (headache, vomiting, dizziness, etc.), which prevents continuity in  
34  
35 370 performing the proposed protocol in future sessions (or both); (3) presenting  
36  
37 371 hemodynamic instability: descompensation of systemic arterial pressure  
38  
39 372 (systolic and diastolic values > 200 mmHg and 110 mmHg, respectively)<sup>54</sup> and  
40  
41 373 HR above the submaximal values allowed during the training maintained even  
42  
43 374 after pauses, calculated by means of the formula  $[HR_{sub} = 0.75 \times (220 -$   
44  
45 375  $age)]^{55}$ ; (3) those who do not adapt to the proposed intervention.  
46  
47  
48  
49  
50

51 376

### 53 377 **Data acquisition**

55 378 For data collection of the CoP variables, 6 static balance tests will be  
56  
57 379 performed on the FP based on their complexity variation and common use in  
58  
59  
60

1  
2  
3 380 the literature<sup>56,57</sup>: bipodal support on a stable surface with eyes open and eyes  
4  
5 381 closed for 30 s each; unipodal support of paretic limbs on a stable surface with  
6  
7 382 eyes open and eyes closed for 30 s each; unipodal support of non-paretic limb  
8  
9 383 on a stable surface with eyes open and eyes closed for 10 s each. The distance  
10  
11 384 between the patients' feet will be standardized<sup>51</sup> and in unipodal support tasks,  
12  
13 385 the contralateral knee may be slightly flexed and there may be no contact  
14  
15 386 between the raised and support leg. Each test can have 1 successful attempt  
16  
17 387 and a maximum of 3 unsuccessful attempts. The attempt is considered invalid if  
18  
19 388 the participant moves their support leg or touches the floor with the contralateral  
20  
21 389 leg<sup>58</sup>.

22  
23  
24  
25  
26 390 For gait analysis during 6MTW, the camera will be positioned  
27  
28 391 perpendicular to the plane of motion, at a height of 1 m and 3 m away from the  
29  
30 392 subject to capture gait pattern of the hemiparetic side, and will be considered as  
31  
32 393 complete gait cycle. Markers will be placed on the main bone references of the  
33  
34 394 paretic lower limb (greater trochanter of the femur, lateral tibial condyle, lateral  
35  
36 395 fibular malleolus, fifth metatarsal head, and lateral calcaneal bone tuberosity)  
37  
38 396 for further analysis.

39  
40  
41  
42 397 For encephalographic recording during the FP static balance and walking  
43  
44 398 tests, the Emotiv Epoc headset will be positioned on the user's head according  
45  
46 399 to the international placement in 10-20 positioning system following the  
47  
48 400 manufacturer's specifications<sup>59</sup>.

41  
42  
43  
44  
45  
46  
47  
48  
49  
50  
51 401

## 402 **Data processing**

52  
53  
54 403 The Bertec® Model 4060 platform will be synchronized with Qualisys  
55  
56 404 Motion Capture Systems (Qualisys Medical AB, 411 13 Gothenburg, Sweden),  
57  
58  
59  
60

1  
2  
3 405 and through that system software, Qualisys Track Manager, data for CoP will be  
4  
5 406 collected and converted to MATLAB compatible files (the Mathworks, Natick, RI,  
6  
7 407 USA). The sampling rate will be 40 Hz, and a Butterworth bandpass filter with a  
8  
9 408 cutoff frequency of 15 Hz will be applied to eliminate noise contamination.

10  
11  
12 409 For kinematic analysis, the videos will be converted to an Audio Video  
13  
14 410 Interleave (AVI) file extension and exported to Kinovea software. Hip, knee, and  
15  
16 411 dorsiflexion flexion angles will be evaluated in the middle oscillatory phase of  
17  
18 412 gait, using as reference the follows joints: hip, tibiofemoral  
19  
20 413 metatarsophalangeal and calcaneal. Emotiv EPOC data processing will follow  
21  
22 414 the model used by Oliveira *et al.*<sup>60</sup> (2018). The encephalographic recording will  
23  
24 415 take place during gait and static balance tests, using 10 s of single-leg support  
25  
26 416 activity and a central 10-s cut-out in bipodal support activities.

27  
28  
29  
30  
31 417

### 32 33 418 **Statistical analysis**

34  
35 419 The SPSS (Statistical Package Social Science) V.21.0 software program  
36  
37 420 will be used and significance level of 5% and CI of 95% will be implemented for  
38  
39 421 all statistical analyses. Descriptive analysis of the sample characterization  
40  
41 422 variables will be performed through central tendency and dispersion measures.

42  
43 423 The Kolmogorov-Smirnov test will initially be performed to evaluate the  
44  
45 424 normality of the data. To intragroup comparisons t-Student test or Wilcoxon test  
46  
47 425 will be used. Intergroup comparisons will be evaluated using ANOVA or  
48  
49 426 Kruskal-Wallis, depending on the normality of the data. Intention-to-treat  
50  
51 427 analysis will be performed for dropout data, considering the last data obtained  
52  
53 428 from the participant.

54  
55  
56  
57  
58 429  
59  
60

### 430 **Patient and public involvement**

431 Patients were not involved in the design of this trial, establishing the  
432 research question or developing recruitment procedures. At the end of the  
433 study, the results will be reported to the participants in the form of a lecture,  
434 showing the effects found in the studied variables. The results of the study will  
435 be disseminated to participants through social networks and will be submitted to  
436 a peer-reviewed journal and scientific meetings.

### 438 **Ethics and dissemination**

439 This research was approved by the Research Ethics Committee of the  
440 Federal University of Rio Grande do Norte, with protocol number 3.434.350 in  
441 July 3, 2019 and trial registration number RBR-78v9hx (Brazilian Registry of  
442 Clinical Trials). Participants will be informed of the study objectives, its risks and  
443 benefits, and when eligible for inclusion, if they agree to participate, must sign  
444 the informed consent before the study begins. They will be free to abandon the  
445 study at any time without the obligation of giving any explanation.

446 There will be prior contact with individuals through social networks, when  
447 all information about the study will be presented, as well as the Resolution No.  
448 466/2012 of the Brazilian National Health Council of 2012, which provides  
449 guidelines and standards for research involving human subjects. In case any  
450 negative effects occur, participants who suffer harm from trial participation will  
451 receive physical assistance according to the injury. The study results will be  
452 disseminated to participants through social networks and will be submitted to a  
453 peer-reviewed journal and scientific meetings.

454

1  
2  
3 455 **Protocol amendments**  
4

5 456 Protocol amendments will be documented with a description of the  
6  
7 457 change and the date of the change.  
8  
9

10 458

11  
12 459 **Study status**  
13

14 460 Subject recruitment is underway, started at November 2019, but the first  
15  
16 461 inclusion was in January 2020. To date, eight patients were enrolled. The  
17  
18 462 recruitment period spans over October 2020 with the goal to include 21 patients  
19  
20 463 per treatment group, each patient completing the rehabilitation program and  
21  
22 464 evaluation before, after and 8 weeks later.  
23  
24  
25

26 465

27  
28 466 **Acknowledgements**  
29

30 467 This Study was financed in part by the Coordenação de Aperfeiçoamento  
31  
32 468 de Pessoal de Nível Superior – Brasil (CAPES) – Doctorate's degree  
33  
34 469 scholarship, Finance Code 001.  
35  
36

37 470

38  
39 471 **Authors' contributions**  
40

41  
42 472 NPOSB led the study design and wrote the manuscript. BFLF, CSPM,  
43  
44 473 TSR, TFC, FACC have made substantial contributions to the design of the  
45  
46 474 study. NPOS, BFLF participate in the patient recruitment, and data collection.  
47  
48 475 All the authors reviewed and approved the manuscript.  
49

50 476

51  
52 477 **Funding**  
53

54  
55 478 The authors have not declared a specific grant for this research from any  
56  
57 479 funding agency in the public, commercial or not-for-profit sectors.  
58  
59  
60



1  
2  
3 480 **Competing interests**  
4

5 481 None declared.  
6  
7  
8 482

9  
10 483 **References**  
11

- 12 484 1. World Health Organization. Global Health Estimates 2016: Deaths by  
13 Cause, Age, Sex, by Country and by Region, 2000-2016. Geneva, World  
14 485 Health Organization; 2018. Available from:  
15 486 [https://www.who.int/healthinfo/global\\_burden\\_disease/estimates/en/inde](https://www.who.int/healthinfo/global_burden_disease/estimates/en/index1.html)  
16 487 [x1.html](https://www.who.int/healthinfo/global_burden_disease/estimates/en/index1.html) Accessed 22 Nov 2019.  
17 488  
18  
19 489 2. Brasil. Óbitos p/ Ocorrência segundo Causa - CID-BR-10. In:  
20 490 Informações de Saúde: Estatísticas vitais: mortalidade: Mortalidade geral  
21 491 – 1996 a 2014: Região e Unidade da Federação. Ministério da Saúde.  
22 492 2014. Available from: <http://www.datasus.gov.br> Accessed 22 Nov 2019.  
23 493  
24 494 3. Bensenor IM, Goulart AC, Szwarcwald CL, *et al.* Prevalence of stroke  
25 495 and associated disability in Brazil: National Health Survey – 2013. *Arq*  
26 496 *Neuropsiquiatr.* 2015;73:746–50. doi: 10.1590/0004-282X20150115  
27 497  
28 498 4. Dickstein R, Abulaffio N. Postural sway of the affected and non affected  
29 499 pelvis and leg in stance of hemiparetic patients. *Arch Phys Med Rehabil.*  
30 500 2000;81(3):364-7. doi: 10.1016/s0003-9993(00)90085-6.  
31 501  
32 502 5. de Haart M, Geurts AC, Dault MC, *et al.* Restoration of weight-shifting  
33 503 capacity in patients with post acute stroke: a rehabilitation cohort study.  
34 504 *Arch Phys Med Rehabil.* 2005; 86(4):755-62. doi:  
35 10.1016/j.apmr.2004.10.010.  
36 505  
37 506 6. Lee CH, Kim Y, Lee BH. Augmented reality-based postural control  
38 507 training improves gait function in patients with stroke: Randomized  
39 508  
40 509  
41 510

- 1  
2  
3 505 controlled trial. *Hong Kong Physiotherapy Journal*. 2014;32:51-7.  
4  
5 506 doi.org/10.1016/j.hkpj.2014.04.002  
6  
7  
8 507 7. Langhorne P, Coupar F, Pollock A. Motor recovery after stroke: a  
9  
10 508 systematic review. *Lancet Neurol*. 2009;8:741–54. doi: 10.1016/S1474-  
11  
12 509 4422(09)70150-4.  
13  
14 510 8. Barato G, Fernandes T, Pacheco M. Cortical plasticity and neurological  
15  
16 511 physical therapy techniques in neuroimage optic. *Rev Neurocienc*.  
17  
18 512 2009;17(4):342-48.  
19  
20 513 9. Slobounov S, Hallett M, Stanhope S, *et al*. Role of cerebral cortex in  
21  
22 514 human postural control: an EEG study. *Clin Neurophysiol*. 2005;116:315-  
23  
24 515 23. doi: 10.1016/j.clinph.2004.09.007  
25  
26  
27 516 10. Kleim JA, Jones TA. Principles of experience-dependent neural plasticity:  
28  
29 517 implications for rehabilitation after brain damage. *J Speech Lang Hear*  
30  
31 518 *res*. 2008;51:225-39. doi: 10.1044/1092-4388(2008/018).  
32  
33  
34 519 11. Lefebvre S, Laloux P, Peeters A, *et al*. Dual-tDCS enhances online motor  
35  
36 520 skill learning and long-term retention in chronic stroke patients. *Front*  
37  
38 521 *Hum Neurosci*. 2013;6:343. doi: 10.3389/fnhum.2012.00343.  
39  
40  
41 522 12. Saposnik G, Cohen LG, Mamdani M, *et al*. Efficacy and safety of  
42  
43 523 nonimmersive virtual reality exercising in stroke rehabilitation (EVREST):  
44  
45 524 a randomised, multicentre, single blind, controlled trial. *Lancet Neurol*.  
46  
47 525 2016; 15(10):1019-27. doi: 10.1016/S1474-4422(16)30121-1.  
48  
49  
50 526 13. Park DS, Lee DG, Lee K, *et al*. Effects of virtual reality training using  
51  
52 527 Xbox Kinect on motor function in stroke survivors: a preliminary study. *J*  
53  
54 528 *Stroke Cerebrovasc Dis*. 2017;26:2313–19. doi:  
55  
56 529 10.1016/j.jstrokecerebrovasdis.2017.05.019.  
57  
58  
59  
60

- 1  
2  
3 530 14. Peñasco-Martín B, Reyes-Guzmán A, Gil-Agudo A, *et al.* Aplicación de la  
4  
5 531 realidad virtual en los aspectos motores de la neurorrehabilitación. *Rev*  
6  
7 532 *Neurol.* 2010;51: 481–88. doi: 10.33588/rn.5108.2009665.  
8  
9  
10 533 15. Calabrò RS, Naro A, Russo M, *et al.* The role of virtual reality in  
11  
12 534 improving motor performance as revealed by EEG: a randomized clinical  
13  
14 535 trial. *J Neuroeng Rehabil.* 2017; 14(1):53. doi: 10.1186/s12984-017-  
15  
16 536 0268-4.  
17  
18  
19 537 16. Rohrbach N, Chicklis E, Levac DE. What is the impact of user affect on  
20  
21 538 motor learning in virtual environments after stroke? A scoping review. *J*  
22  
23 539 *Neuroeng Rehabil.* 2019;16:79. doi: 10.1186/s12984-019-0546-4  
24  
25  
26 540 17. Laver KE, Lange B, George S, *et al.* Virtual reality for stroke  
27  
28 541 rehabilitation. *Cochrane Database Syst Rev.* 2017; doi:  
29  
30 542 10.1002/14651858.CD008349.pub4.  
31  
32  
33 543 18. Porrás DC, Siemonsma P, Inzelberg R, *et al.* Advantages of virtual reality  
34  
35 544 in the rehabilitation of balance and gait: systematic review. *Neurology*  
36  
37 545 2018;90:1017-25. doi: 10.1212/WNL.0000000000005603.  
38  
39  
40 546 19. Lee HS, Park YJ, Park SW. The Effects of Virtual Reality Training on  
41  
42 547 Function in Chronic Stroke Patients: A Systematic Review and Meta-  
43  
44 548 Analysis. *Biomed Res. Int.* 2019; 1-12. doi: 10.1155/2019/7595639  
45  
46  
47 549 20. Chan A-W, Tetzlaff JM, Gøtzsche PC, *et al.* SPIRIT 2013 Explanation  
48  
49 550 and Elaboration: Guidance for protocols of clinical  
50  
51 551 trials. *BMJ* 2013;346:e7586. doi:10.1136/bmj.e7586  
52  
53  
54 552 21. Doğan A, Mengüllüoğlu M, Özgirgin N. Evaluation of the effect of ankle-  
55  
56 553 foot orthosis use on balance and mobility in hemiparetic stroke patients.  
57  
58 554 *Disabil Rehabil.* 2011;33:1433-9. doi: 10.3109/09638288.2010.533243.  
59  
60

- 1  
2  
3 555 22. Biering-Sørensen F, Nielsen JB, Klinge K. Spasticity-assessment: a  
4  
5 556 review. *Spinal cord* 2006;44:708-22. doi: 10.1038/sj.sc.3101928  
6  
7  
8 557 23. Folstein MF, Folstein SE, McHugh PR. Mini -Mental State: a practical  
9  
10 558 method for grading the cognitive state of patients for the clinician. *J*  
11  
12 559 *Psychiatr Res.* 1975; 12:189 -98.  
13  
14 560 24. Mehrholz J, Wagner K, Rutte K, *et al.* Predictive validity and  
15  
16 561 responsiveness of the functional ambulation category in hemiparetic  
17  
18 562 patients after stroke. *Arch Phys Med Rehabil.* 2007;88:1314–9. doi:  
19  
20 563 10.1016/j.apmr.2007.06.764  
21  
22  
23 564 25. Brott T, Adams HP Jr, Olinger CP, *et al.* Measurements of acute cerebral  
24  
25 565 infarction: a clinical examination scale. *Stroke* 1989;20:864-70. doi:  
26  
27 566 10.1161/01.str.20.7.864  
28  
29  
30 567 26. Dean AG, Sullivan KM, Soe MM. OpenEpi: Open Source Epidemiologic  
31  
32 568 Statistics for Public Health. 2013. Available from:  
33  
34 569 <http://www.openepi.com/> Accessed 11 Mar 2019.  
35  
36  
37 570 27. Lloréns R, Gil-Gómez JA, Alcañiz M, *et al.* Improvement in balance using  
38  
39 571 a virtual reality-based stepping exercise: a randomized controlled trial  
40  
41 572 involving individuals with chronic stroke. *Clin Rehabil.* 2015; 29(3):261-8.  
42  
43 573 doi: 10.1177/0269215514543333.  
44  
45  
46 574 28. Dallal GE. Randomization.com. Web site Randomization.com. 2013.  
47  
48 575 Available from: <http://www.randomization.com>. Accessed 22 Mar 2019.  
49  
50  
51 576 29. Miyamoto ST, Lombardi Junior I, Berg KO, *et al.* Brazilian version of the  
52  
53 577 Berg balance scale. *Braz J Med Biol Res.* 2004;37:1411-4. doi:  
54  
55 578 10.1590/S0100-879X2004000900017  
56  
57  
58  
59  
60

- 1  
2  
3 579 30.Zambaldi PA, Costa TABN, Diniz GCLM, *et al.* The effect of balance  
4  
5 580 training in a group of community-dwelling elderly women:a pilot study of  
6  
7 581 a specific, non-systematic and short-term approach. *Acta Fisiátrica*  
8  
9 582 2016;14:17-24. doi: 10.5935/0104-7795.20070001  
10  
11  
12 583 31.Duncan PW, Weiner DK, Chandler J, *et al.* Functional reach: a new  
13  
14 584 clinical measure of balance. *J Gerontol.* 1990;45:192-7. doi:  
15  
16 585 10.1093/geronj/45.6.m192  
17  
18  
19 586 32.Silveira KRM, Matas SLA, Perracini MR. Assessment of performance in  
20  
21 587 the functional reach and lateral reach tests in a Brazilian population  
22  
23 588 sample. *Rev bras fisioter.* 2006;10:381-6. doi: 10.1590/S1413-  
24  
25 589 35552006000400004.  
26  
27  
28 590 33.Dutra MC, Cabral AL, Carvalho GA. Brazilian Version of Timed Up and  
29  
30 591 Go Test. *Interfaces* 2016;3:81-8.  
31  
32  
33 592 34.Bischoff HA, Stähelin HB, Monsch AU, *et al.* Identifying a cut-off point for  
34  
35 593 normal mobility: a comparison of the timed 'up and go'test in  
36  
37 594 community-dwelling and institutionalised elderly women. *Age Ageing.*  
38  
39 595 2003;32:315-20. doi: 10.1093/ageing/32.3.315  
40  
41  
42 596 35.Duarte M, Freitas SMSF. Revision of posturography based on force plate  
43  
44 597 for balance evaluation. *Rev. bras. fisioter.* 2010;14:183-92. doi:  
45  
46 598 10.1590/S1413-35552010000300003.  
47  
48  
49 599 36.Luft C, Andrade A. EEG and Motor Learning Research. *Rev Port Cien*  
50  
51 600 *Desp.* 2006;6:106-15.  
52  
53  
54 601 37.Lam HSP, Lau FWK, Chan GKL, *et al.* The validity and reliability of a 6-  
55  
56 602 metre timed walk for the functional assessment of patients with  
57  
58  
59  
60

- 1  
2  
3 603 stroke. *Physiother Theory Pract.* 2010;26:251-5. doi:  
4  
5 604 10.3109/09593980903015235.  
6  
7  
8 605 38.Kinsella S, Moran K. Gait pattern categorization of stroke participants  
9  
10 606 with equinus deformity of the foot. *Gait & posture* 2008;27:144-51. doi:  
11  
12 607 10.1016/j.gaitpost.2007.03.008  
13  
14 608 39.Castro PMMA, de Magalhães AM, Cruz ALC, *et al.* Testes de equilíbrio e  
15  
16 609 mobilidade funcional na predição e prevenção de riscos de quedas em  
17  
18 610 idosos. *Rev bras geriatr gerontol.* 2015;18:129-40. doi: 10.1590/1809-  
19  
20 611 9823.2015.13208.  
21  
22  
23 612 40.Puig-Diví A, Escalona-Marfil C, Padullés-Riu JM, *et al.* Validity and  
24  
25 613 reliability of the Kinovea program in obtaining angles and distances using  
26  
27 614 coordinates in 4 perspectives. *PloS one* 2019;14:6. doi:  
28  
29 615 10.1371/journal.pone.0216448  
30  
31  
32  
33 616 41.Riberto M, Miyazaki MH, Jucá SS, *et al.* Validation of the Brazilian  
34  
35 617 version of Functional Independence. *Measure Acta fisiátrica* 2016;11:72-  
36  
37 618 6. doi:10.5935/0104-7795.20040003  
38  
39  
40  
41 619 42.Lima RCM, Teixeira-Salmela LF, Magalhães LC, *et al.* Psychometric  
42  
43 620 properties of the Brazilian version of the Stroke Specific Quality of Life  
44  
45 621 Scale: application of the Rasch model. *Braz J Phys Ther.* 2008;12:149-  
46  
47 622 56. doi: 10.1590/S1413-35552008000200012  
48  
49  
50  
51 623 43.Mcauley E, Duncan T, Tammen V. Psychometric Properties of the  
52  
53 624 Intrinsic Motivation Inventory in a Competitive Sport Setting: A  
54  
55 625 Confirmatory Factor Analysis. *Res Q Exerc Sport* 1989;60:48-58. doi:  
56  
57 626 10.1080/02701367.1989.10607413  
58  
59  
60

- 1  
2  
3 627 44. Borg G, Hassmén P, Lagerström M. Perceived exertion related to heart  
4  
5 628 rate and blood lactate during arm and leg exercise. *Eur J Appl Physiol*  
6  
7 629 *Occup Physiol*. 1987;56:679–85. doi: 10.1007/bf00424810  
8  
9  
10 630 45. Foster C, Florhaug JA, Franklin J, *et al*. A new approach to monitoring  
11  
12 631 exercise training. *J Strength Cond Res*. 2001; 15:109–15. doi:  
13  
14 632 10.1519/00124278-200102000-00019  
15  
16  
17 633 46. Galvao MLC, Gouvea PM, Ocamato GN, *et al*. Virtual reality effect on  
18  
19 634 upper limb motor function paretic in post stroke. *Rev Neurocienc*.  
20  
21 635 2015;23:493–8. doi: 10.4181/RNC.2015.23.04.1038.06p  
22  
23  
24 636 47. Allet L, Armand S, de Bie RA, *et al*. The gait and balance of patients with  
25  
26 637 diabetes can be improved: a randomised controlled trial. *Diabetologia*  
27  
28 638 2010;53:458-66. doi: 10.1007/s00125-009-1592-4.  
29  
30  
31 639 48. Soares MA, Sacchelli T. Effects of physical therapy on balance of elderly  
32  
33 640 people. *Rev Neurocienc*. 2008;16:97-100.  
34  
35  
36 641 49. Nascimento LCG, Patrizzi LJ, Oliveira CCES. Result of four weeks of  
37  
38 642 proprioceptive training in the studied postural balance of elderly. *Fisioter*  
39  
40 643 *mov*. 2012;25:325-31. doi: 10.1590/S0103-51502012000200010.  
41  
42  
43 644 50. Ribeiro KMOB, Oliveira BS, Ferreira LM, *et al*. Effectiveness of Otolith  
44  
45 645 Repositioning Maneuvers and Vestibular Rehabilitation exercises in  
46  
47 646 elderly people with Benign Paroxysmal Positional Vertigo: a systematic  
48  
49 647 review. *Braz J Otorhinolaryngol*. 2015;84:104-18. doi:  
50  
51 648 10.1016/j.bjorl.2017.06.003  
52  
53  
54 649 51. Karasu AU, Batur EB, Karataş GK. Effectiveness of Wii-Based  
55  
56 650 Rehabilitation in Stroke: A Randomized Controlled Study. *J Rehabil Med*.  
57  
58 651 2018;50:406-12. doi: 10.2340/16501977-2331.  
59  
60

- 1  
2  
3 652 52. Hung JW, Chou CX, Hsieh YW, *et al.* Randomized comparison trial of  
4  
5 653 balance training by using exergaming and conventional weight-shift  
6  
7 654 therapy in patients with chronic stroke. *Arch Phys Med Rehabil.*  
8  
9 655 2014;95(9):1629–37. doi: 10.1016/j.apmr.2014.04.029.  
10  
11  
12 656 53. Agmon M, Perry CK, Phelan E, *et al.* A pilot study of Wii Fit exergames  
13  
14 657 to improve balance in older adults. *J Geriatr Phys Ther.* 2011;34:161-7.  
15  
16 658 doi: 10.1519/JPT.0b013e3182191d98.  
17  
18  
19 659 54. Balady GJ, Chaitman B, Driscoll D, *et al.* American College of Sports  
20  
21 660 Medicine Position Stand and American Heart Association.  
22  
23 661 Recommendations for cardiovascular screening, staffing, and emergency  
24  
25 662 policies at health/fitness facilities. *Circulation.* 1998;97:2283–93.  
26  
27  
28  
29 663 55. Fox SM 3rd, Naughton JP, Haskell WL. Physical activity and the  
30  
31 664 prevention of coronary heart disease. *Ann Clin Res.* 1971;3:404–32.  
32  
33  
34 665 56. Scaglioni-solano P, Aragón-vargas LF. Validity and reliability of the  
35  
36 666 Nintendo Wii Balance Board to assess standing balance and sensory  
37  
38 667 integration in highly functional older adults. *Int J Rehabil Res.*  
39  
40 668 2014;37:138-43. doi: 10.1097/MRR.0000000000000046.  
41  
42  
43 669 57. Hytönen M, Pyykkö I, Aalto H, *et al.* Postural Control and Age. *Acta oto-*  
44  
45 670 *laryngologica* 1993;113:119-22. doi: 10.3109/00016489309135778  
46  
47  
48 671 58. Grabiner MD, Lundin TM, Feuerbach JW. Converting Chattecx Balance  
49  
50 672 System vertical reaction force measurements to center of pressure  
51  
52 673 excursion measurements. *Phys Ther.* 1993;73:316-9. doi:  
53  
54 674 10.1093/ptj/73.5.316  
55  
56  
57 675 59. EMOTIV. Emotiv software development kit user manual for release  
58  
59 676 1.0.0.3. HongKong: Emotiv Ltd, 2011.  
60



- 1  
2  
3 677 60.Oliveira SMS, Medeiros CSP, Pacheco TBF, *et al.*  
4  
5 678 Electroencephalographic changes using virtual reality program: technical  
6  
7 679 note condensed title: a study using a mobile EEG device. *Neurol Res.*  
8  
9 680 2018;40(3):160-5. doi: 10.1080/01616412.2017.1420584.  
10  
11  
12 681  
13  
14  
15  
16  
17  
18  
19  
20  
21  
22  
23  
24  
25  
26  
27  
28  
29  
30  
31  
32  
33  
34  
35  
36  
37  
38  
39  
40  
41  
42  
43  
44  
45  
46  
47  
48  
49  
50  
51  
52  
53  
54  
55  
56  
57  
58  
59  
60

For peer review only

1  
2  
3 682 **Figure Legends**  
4

5 683

6  
7 684 **Figure 1.** Schedule of enrollment, interventions, and assessments. Legend:  $t_1$

8  
9 685 1st week,  $t_{10}$  10th week,  $t_{\text{post}10}$  post-training,  $t_{18}$  18th week.  
10  
11

12 686

13  
14 687 **Figure 2.** The schematic study design.  
15

16  
17 688  
18  
19  
20  
21  
22  
23  
24  
25  
26  
27  
28  
29  
30  
31  
32  
33  
34  
35  
36  
37  
38  
39  
40  
41  
42  
43  
44  
45  
46  
47  
48  
49  
50  
51  
52  
53  
54  
55  
56  
57  
58  
59  
60

For peer review only

| TIMEPOINT                                          | STUDY PERIOD  |   |                   |                |          |
|----------------------------------------------------|---------------|---|-------------------|----------------|----------|
|                                                    | Pre-treatment |   | Post-allocation   | Post-treatment |          |
|                                                    | $-t_1$        | 0 | $t_1$ to $t_{10}$ | $t_{post10}$   | $t_{18}$ |
| <b>ENROLMENT:</b>                                  |               |   |                   |                |          |
| Eligibility screen                                 | X             |   |                   |                |          |
| Informed consent                                   | X             |   |                   |                |          |
| Allocation                                         |               | X |                   |                |          |
| <b>INTERVENTIONS:</b>                              |               |   |                   |                |          |
| <i>Control Group</i>                               |               |   |                   |                |          |
| <i>Experimental Group</i>                          |               |   |                   |                |          |
| <b>ASSESSMENTS:</b>                                |               |   |                   |                |          |
| <i>Postural balance deficits</i>                   | X             |   |                   |                |          |
| <i>Cognitive screening</i>                         | X             |   |                   |                |          |
| <i>Spasticity</i>                                  | X             |   |                   |                |          |
| <i>Ability to walk</i>                             | X             |   |                   |                |          |
| <i>Stroke severity</i>                             | X             |   |                   |                |          |
| <i>Clinical and demographic data</i>               |               | X |                   |                |          |
| <i>Cardiovascular parameter variables</i>          |               | X | X                 | X              | X        |
| <i>Adverse symptoms, perceived effort and pain</i> |               |   | X                 |                |          |
| <i>Postural balance</i>                            |               | X |                   | X              | X        |
| <i>Gait speed and kinematic analysis</i>           |               | X |                   | X              | X        |
| <i>Cortical Activation Patterns</i>                |               | X |                   | X              | X        |
| <i>Functional independence</i>                     |               | X |                   | X              | X        |
| <i>Quality of life</i>                             |               | X |                   | X              | X        |
| <i>Motivation</i>                                  |               |   |                   | X              |          |
| <i>Adverse events</i>                              |               |   |                   |                | X        |

Figure 1. Schedule of enrollment, interventions, and assessments. Legend:  $t_1$  1st week,  $t_{10}$  10th week,  $t_{post10}$  post-training,  $t_{18}$  18th week.

170x224mm (300 x 300 DPI)

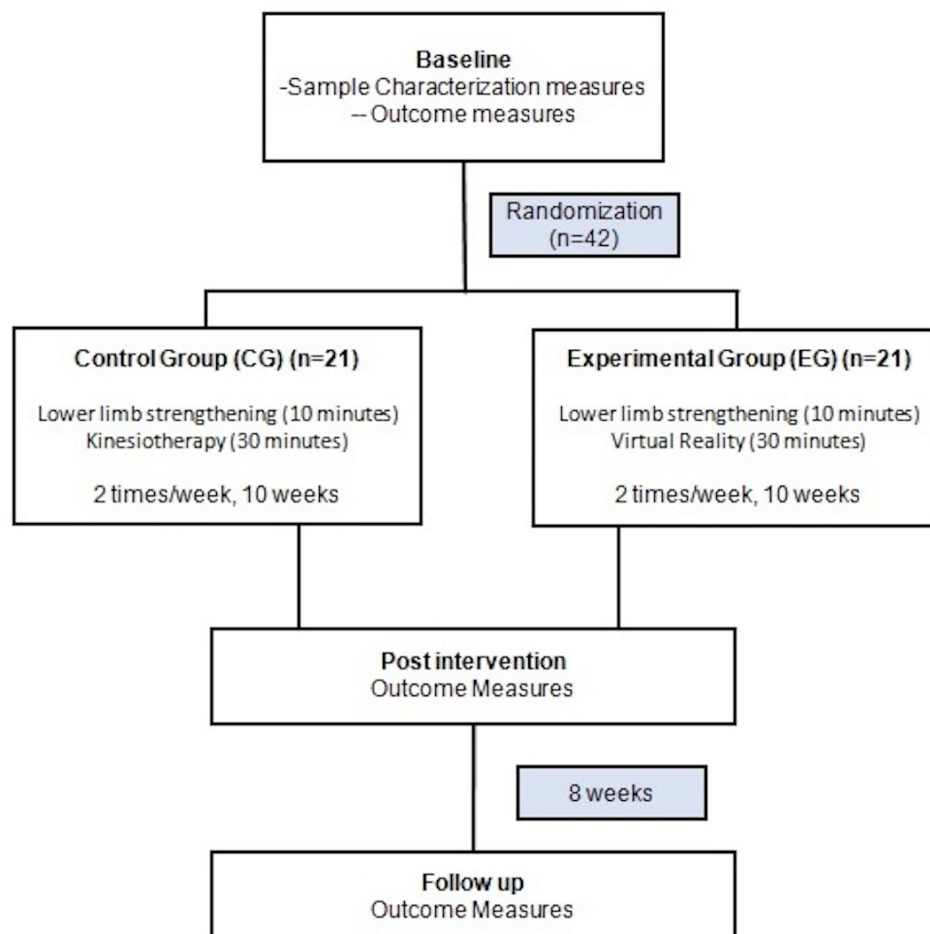

Figure 2. The schematic study design.

95x90mm (300 x 300 DPI)

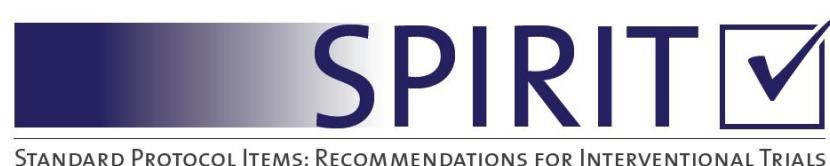

| Section/item                      | Item No | Description                                                                                                                                                                                                                                                                              | Addressed on page number |
|-----------------------------------|---------|------------------------------------------------------------------------------------------------------------------------------------------------------------------------------------------------------------------------------------------------------------------------------------------|--------------------------|
| <b>Administrative information</b> |         |                                                                                                                                                                                                                                                                                          |                          |
| Title                             | 1       | Descriptive title identifying the study design, population, interventions, and, if applicable, trial acronym                                                                                                                                                                             | 1                        |
| Trial registration                | 2a      | Trial identifier and registry name. If not yet registered, name of intended registry                                                                                                                                                                                                     | 2; 210                   |
|                                   | 2b      | All items from the World Health Organization Trial Registration Data Set                                                                                                                                                                                                                 | 20                       |
| Protocol version                  | 3       | Date and version identifier                                                                                                                                                                                                                                                              | 1                        |
| Funding                           | 4       | Sources and types of financial, material, and other support                                                                                                                                                                                                                              | 21                       |
| Roles and responsibilities        | 5a      | Names, affiliations, and roles of protocol contributors                                                                                                                                                                                                                                  | 1; 21                    |
|                                   | 5b      | Name and contact information for the trial sponsor                                                                                                                                                                                                                                       | 21                       |
|                                   | 5c      | Role of study sponsor and funders, if any, in study design; collection, management, analysis, and interpretation of data; writing of the report; and the decision to submit the report for publication, including whether they will have ultimate authority over any of these activities | Not applicable           |
|                                   | 5d      | Composition, roles, and responsibilities of the coordinating centre, steering committee, endpoint adjudication committee, data management team, and other individuals or groups overseeing the trial, if applicable (see Item 21a for data monitoring committee)                         | Not applicable           |
| <b>Introduction</b>               |         |                                                                                                                                                                                                                                                                                          |                          |
| Background and rationale          | 6a      | Description of research question and justification for undertaking the trial, including summary of relevant studies (published and unpublished) examining benefits and harms for each intervention                                                                                       | 4-6                      |

|    |                                                           |     |                                                                                                                                                                                                                                                                                                                                                                                |
|----|-----------------------------------------------------------|-----|--------------------------------------------------------------------------------------------------------------------------------------------------------------------------------------------------------------------------------------------------------------------------------------------------------------------------------------------------------------------------------|
| 1  |                                                           |     |                                                                                                                                                                                                                                                                                                                                                                                |
| 2  |                                                           |     |                                                                                                                                                                                                                                                                                                                                                                                |
| 3  |                                                           |     |                                                                                                                                                                                                                                                                                                                                                                                |
| 4  |                                                           | 6b  | Explanation for choice of comparators                                                                                                                                                                                                                                                                                                                                          |
| 5  | Objectives                                                | 7   | Specific objectives or hypotheses                                                                                                                                                                                                                                                                                                                                              |
| 6  |                                                           |     |                                                                                                                                                                                                                                                                                                                                                                                |
| 7  | Trial design                                              | 8   | Description of trial design including type of trial (eg, parallel group, crossover, factorial, single group), allocation ratio, and framework (eg, superiority, equivalence, noninferiority, exploratory)                                                                                                                                                                      |
| 8  |                                                           |     |                                                                                                                                                                                                                                                                                                                                                                                |
| 9  |                                                           |     |                                                                                                                                                                                                                                                                                                                                                                                |
| 10 |                                                           |     |                                                                                                                                                                                                                                                                                                                                                                                |
| 11 | <b>Methods: Participants, interventions, and outcomes</b> |     |                                                                                                                                                                                                                                                                                                                                                                                |
| 12 |                                                           |     |                                                                                                                                                                                                                                                                                                                                                                                |
| 13 | Study setting                                             | 9   | Description of study settings (eg, community clinic, academic hospital) and list of countries where data will be collected. Reference to where list of study sites can be obtained                                                                                                                                                                                             |
| 14 |                                                           |     |                                                                                                                                                                                                                                                                                                                                                                                |
| 15 | Eligibility criteria                                      | 10  | Inclusion and exclusion criteria for participants. If applicable, eligibility criteria for study centres and individuals who will perform the interventions (eg, surgeons, psychotherapists)                                                                                                                                                                                   |
| 16 |                                                           |     |                                                                                                                                                                                                                                                                                                                                                                                |
| 17 |                                                           |     |                                                                                                                                                                                                                                                                                                                                                                                |
| 18 | Interventions                                             | 11a | Interventions for each group with sufficient detail to allow replication, including how and when they will be administered                                                                                                                                                                                                                                                     |
| 19 |                                                           |     |                                                                                                                                                                                                                                                                                                                                                                                |
| 20 |                                                           |     |                                                                                                                                                                                                                                                                                                                                                                                |
| 21 |                                                           |     |                                                                                                                                                                                                                                                                                                                                                                                |
| 22 |                                                           | 11b | Criteria for discontinuing or modifying allocated interventions for a given trial participant (eg, drug dose change in response to harms, participant request, or improving/worsening disease)                                                                                                                                                                                 |
| 23 |                                                           |     |                                                                                                                                                                                                                                                                                                                                                                                |
| 24 |                                                           |     |                                                                                                                                                                                                                                                                                                                                                                                |
| 25 |                                                           | 11c | Strategies to improve adherence to intervention protocols, and any procedures for monitoring adherence (eg, drug tablet return, laboratory tests)                                                                                                                                                                                                                              |
| 26 |                                                           |     |                                                                                                                                                                                                                                                                                                                                                                                |
| 27 |                                                           |     |                                                                                                                                                                                                                                                                                                                                                                                |
| 28 |                                                           | 11d | Relevant concomitant care and interventions that are permitted or prohibited during the trial                                                                                                                                                                                                                                                                                  |
| 29 |                                                           |     |                                                                                                                                                                                                                                                                                                                                                                                |
| 30 | Outcomes                                                  | 12  | Primary, secondary, and other outcomes, including the specific measurement variable (eg, systolic blood pressure), analysis metric (eg, change from baseline, final value, time to event), method of aggregation (eg, median, proportion), and time point for each outcome. Explanation of the clinical relevance of chosen efficacy and harm outcomes is strongly recommended |
| 31 |                                                           |     |                                                                                                                                                                                                                                                                                                                                                                                |
| 32 |                                                           |     |                                                                                                                                                                                                                                                                                                                                                                                |
| 33 |                                                           |     |                                                                                                                                                                                                                                                                                                                                                                                |
| 34 | Participant timeline                                      | 13  | Time schedule of enrolment, interventions (including any run-ins and washouts), assessments, and visits for participants. A schematic diagram is highly recommended (see Figure)                                                                                                                                                                                               |
| 35 |                                                           |     |                                                                                                                                                                                                                                                                                                                                                                                |
| 36 |                                                           |     |                                                                                                                                                                                                                                                                                                                                                                                |
| 37 | Sample size                                               | 14  | Estimated number of participants needed to achieve study objectives and how it was determined, including clinical and statistical assumptions supporting any sample size calculations                                                                                                                                                                                          |
| 38 |                                                           |     |                                                                                                                                                                                                                                                                                                                                                                                |
| 39 |                                                           |     |                                                                                                                                                                                                                                                                                                                                                                                |
| 40 |                                                           |     |                                                                                                                                                                                                                                                                                                                                                                                |
| 41 |                                                           |     |                                                                                                                                                                                                                                                                                                                                                                                |
| 42 |                                                           |     |                                                                                                                                                                                                                                                                                                                                                                                |
| 43 |                                                           |     |                                                                                                                                                                                                                                                                                                                                                                                |
| 44 |                                                           |     |                                                                                                                                                                                                                                                                                                                                                                                |
| 45 |                                                           |     |                                                                                                                                                                                                                                                                                                                                                                                |
| 46 |                                                           |     |                                                                                                                                                                                                                                                                                                                                                                                |

|    |                                                                     |     |                                                                                                                                                                                                                                                                                                                                                                                                              |        |
|----|---------------------------------------------------------------------|-----|--------------------------------------------------------------------------------------------------------------------------------------------------------------------------------------------------------------------------------------------------------------------------------------------------------------------------------------------------------------------------------------------------------------|--------|
| 1  |                                                                     |     |                                                                                                                                                                                                                                                                                                                                                                                                              |        |
| 2  |                                                                     |     |                                                                                                                                                                                                                                                                                                                                                                                                              |        |
| 3  |                                                                     |     |                                                                                                                                                                                                                                                                                                                                                                                                              |        |
| 4  | Recruitment                                                         | 15  | Strategies for achieving adequate participant enrolment to reach target sample size                                                                                                                                                                                                                                                                                                                          | 8      |
| 5  | <b>Methods: Assignment of interventions (for controlled trials)</b> |     |                                                                                                                                                                                                                                                                                                                                                                                                              |        |
| 6  | <b>Allocation:</b>                                                  |     |                                                                                                                                                                                                                                                                                                                                                                                                              |        |
| 7  | Allocation:                                                         |     |                                                                                                                                                                                                                                                                                                                                                                                                              |        |
| 8  |                                                                     |     |                                                                                                                                                                                                                                                                                                                                                                                                              |        |
| 9  | Sequence generation                                                 | 16a | Method of generating the allocation sequence (eg, computer-generated random numbers), and list of any factors for stratification. To reduce predictability of a random sequence, details of any planned restriction (eg, blocking) should be provided in a separate document that is unavailable to those who enrol participants or assign interventions                                                     | 8      |
| 10 |                                                                     |     |                                                                                                                                                                                                                                                                                                                                                                                                              |        |
| 11 |                                                                     |     |                                                                                                                                                                                                                                                                                                                                                                                                              |        |
| 12 |                                                                     |     |                                                                                                                                                                                                                                                                                                                                                                                                              |        |
| 13 |                                                                     |     |                                                                                                                                                                                                                                                                                                                                                                                                              |        |
| 14 | Allocation concealment mechanism                                    | 16b | Mechanism of implementing the allocation sequence (eg, central telephone; sequentially numbered, opaque, sealed envelopes), describing any steps to conceal the sequence until interventions are assigned                                                                                                                                                                                                    | 8      |
| 15 |                                                                     |     |                                                                                                                                                                                                                                                                                                                                                                                                              |        |
| 16 |                                                                     |     |                                                                                                                                                                                                                                                                                                                                                                                                              |        |
| 17 |                                                                     |     |                                                                                                                                                                                                                                                                                                                                                                                                              |        |
| 18 | Implementation                                                      | 16c | Who will generate the allocation sequence, who will enrol participants, and who will assign participants to interventions                                                                                                                                                                                                                                                                                    | 8      |
| 19 |                                                                     |     |                                                                                                                                                                                                                                                                                                                                                                                                              |        |
| 20 | Blinding (masking)                                                  | 17a | Who will be blinded after assignment to interventions (eg, trial participants, care providers, outcome assessors, data analysts), and how                                                                                                                                                                                                                                                                    | 8      |
| 21 |                                                                     |     |                                                                                                                                                                                                                                                                                                                                                                                                              |        |
| 22 |                                                                     |     |                                                                                                                                                                                                                                                                                                                                                                                                              |        |
| 23 |                                                                     | 17b | If blinded, circumstances under which unblinding is permissible, and procedure for revealing a participant's allocated intervention during the trial                                                                                                                                                                                                                                                         | 8      |
| 24 |                                                                     |     |                                                                                                                                                                                                                                                                                                                                                                                                              |        |
| 25 |                                                                     |     |                                                                                                                                                                                                                                                                                                                                                                                                              |        |
| 26 | <b>Methods: Data collection, management, and analysis</b>           |     |                                                                                                                                                                                                                                                                                                                                                                                                              |        |
| 27 |                                                                     |     |                                                                                                                                                                                                                                                                                                                                                                                                              |        |
| 28 | Data collection methods                                             | 18a | Plans for assessment and collection of outcome, baseline, and other trial data, including any related processes to promote data quality (eg, duplicate measurements, training of assessors) and a description of study instruments (eg, questionnaires, laboratory tests) along with their reliability and validity, if known. Reference to where data collection forms can be found, if not in the protocol | 9-13   |
| 29 |                                                                     |     |                                                                                                                                                                                                                                                                                                                                                                                                              |        |
| 30 |                                                                     |     |                                                                                                                                                                                                                                                                                                                                                                                                              |        |
| 31 |                                                                     |     |                                                                                                                                                                                                                                                                                                                                                                                                              |        |
| 32 |                                                                     |     |                                                                                                                                                                                                                                                                                                                                                                                                              |        |
| 33 |                                                                     | 18b | Plans to promote participant retention and complete follow-up, including list of any outcome data to be collected for participants who discontinue or deviate from intervention protocols                                                                                                                                                                                                                    | 13; 17 |
| 34 |                                                                     |     |                                                                                                                                                                                                                                                                                                                                                                                                              |        |
| 35 |                                                                     |     |                                                                                                                                                                                                                                                                                                                                                                                                              |        |
| 36 | Data management                                                     | 19  | Plans for data entry, coding, security, and storage, including any related processes to promote data quality (eg, double data entry; range checks for data values). Reference to where details of data management procedures can be found, if not in the protocol                                                                                                                                            | 8      |
| 37 |                                                                     |     |                                                                                                                                                                                                                                                                                                                                                                                                              |        |
| 38 |                                                                     |     |                                                                                                                                                                                                                                                                                                                                                                                                              |        |
| 39 |                                                                     |     |                                                                                                                                                                                                                                                                                                                                                                                                              |        |
| 40 |                                                                     |     |                                                                                                                                                                                                                                                                                                                                                                                                              |        |
| 41 |                                                                     |     |                                                                                                                                                                                                                                                                                                                                                                                                              |        |
| 42 |                                                                     |     |                                                                                                                                                                                                                                                                                                                                                                                                              |        |
| 43 |                                                                     |     |                                                                                                                                                                                                                                                                                                                                                                                                              |        |
| 44 |                                                                     |     |                                                                                                                                                                                                                                                                                                                                                                                                              |        |
| 45 |                                                                     |     |                                                                                                                                                                                                                                                                                                                                                                                                              |        |
| 46 |                                                                     |     |                                                                                                                                                                                                                                                                                                                                                                                                              |        |

|    |                                 |     |                                                                                                                                                                                                                                                                                                                                       |                |
|----|---------------------------------|-----|---------------------------------------------------------------------------------------------------------------------------------------------------------------------------------------------------------------------------------------------------------------------------------------------------------------------------------------|----------------|
| 1  |                                 |     |                                                                                                                                                                                                                                                                                                                                       |                |
| 2  |                                 |     |                                                                                                                                                                                                                                                                                                                                       |                |
| 3  |                                 |     |                                                                                                                                                                                                                                                                                                                                       |                |
| 4  | Statistical methods             | 20a | Statistical methods for analysing primary and secondary outcomes. Reference to where other details of the statistical analysis plan can be found, if not in the protocol                                                                                                                                                              | 17-19          |
| 5  |                                 |     |                                                                                                                                                                                                                                                                                                                                       |                |
| 6  |                                 | 20b | Methods for any additional analyses (eg, subgroup and adjusted analyses)                                                                                                                                                                                                                                                              | 19             |
| 7  |                                 |     |                                                                                                                                                                                                                                                                                                                                       |                |
| 8  |                                 | 20c | Definition of analysis population relating to protocol non-adherence (eg, as randomised analysis), and any statistical methods to handle missing data (eg, multiple imputation)                                                                                                                                                       | 19             |
| 9  |                                 |     |                                                                                                                                                                                                                                                                                                                                       |                |
| 10 |                                 |     |                                                                                                                                                                                                                                                                                                                                       |                |
| 11 | <b>Methods: Monitoring</b>      |     |                                                                                                                                                                                                                                                                                                                                       |                |
| 12 |                                 |     |                                                                                                                                                                                                                                                                                                                                       |                |
| 13 | Data monitoring                 | 21a | Composition of data monitoring committee (DMC); summary of its role and reporting structure; statement of whether it is independent from the sponsor and competing interests; and reference to where further details about its charter can be found, if not in the protocol. Alternatively, an explanation of why a DMC is not needed | Not applicable |
| 14 |                                 |     |                                                                                                                                                                                                                                                                                                                                       |                |
| 15 |                                 | 21b | Description of any interim analyses and stopping guidelines, including who will have access to these interim results and make the final decision to terminate the trial                                                                                                                                                               | 8              |
| 16 |                                 |     |                                                                                                                                                                                                                                                                                                                                       |                |
| 17 |                                 |     |                                                                                                                                                                                                                                                                                                                                       |                |
| 18 |                                 |     |                                                                                                                                                                                                                                                                                                                                       |                |
| 19 |                                 |     |                                                                                                                                                                                                                                                                                                                                       |                |
| 20 | Harms                           | 22  | Plans for collecting, assessing, reporting, and managing solicited and spontaneously reported adverse events and other unintended effects of trial interventions or trial conduct                                                                                                                                                     | 13             |
| 21 |                                 |     |                                                                                                                                                                                                                                                                                                                                       |                |
| 22 |                                 |     |                                                                                                                                                                                                                                                                                                                                       |                |
| 23 | Auditing                        | 23  | Frequency and procedures for auditing trial conduct, if any, and whether the process will be independent from investigators and the sponsor                                                                                                                                                                                           | Not applicable |
| 24 |                                 |     |                                                                                                                                                                                                                                                                                                                                       |                |
| 25 |                                 |     |                                                                                                                                                                                                                                                                                                                                       |                |
| 26 |                                 |     |                                                                                                                                                                                                                                                                                                                                       |                |
| 27 | <b>Ethics and dissemination</b> |     |                                                                                                                                                                                                                                                                                                                                       |                |
| 28 |                                 |     |                                                                                                                                                                                                                                                                                                                                       |                |
| 29 | Research ethics approval        | 24  | Plans for seeking research ethics committee/institutional review board (REC/IRB) approval                                                                                                                                                                                                                                             | 20             |
| 30 |                                 |     |                                                                                                                                                                                                                                                                                                                                       |                |
| 31 | Protocol amendments             | 25  | Plans for communicating important protocol modifications (eg, changes to eligibility criteria, outcomes, analyses) to relevant parties (eg, investigators, REC/IRBs, trial participants, trial registries, journals, regulators)                                                                                                      | 21             |
| 32 |                                 |     |                                                                                                                                                                                                                                                                                                                                       |                |
| 33 |                                 |     |                                                                                                                                                                                                                                                                                                                                       |                |
| 34 |                                 |     |                                                                                                                                                                                                                                                                                                                                       |                |
| 35 | Consent or assent               | 26a | Who will obtain informed consent or assent from potential trial participants or authorised surrogates, and how (see Item 32)                                                                                                                                                                                                          | 20             |
| 36 |                                 |     |                                                                                                                                                                                                                                                                                                                                       |                |
| 37 |                                 |     |                                                                                                                                                                                                                                                                                                                                       |                |
| 38 |                                 | 26b | Additional consent provisions for collection and use of participant data and biological specimens in ancillary studies, if applicable                                                                                                                                                                                                 | 20             |
| 39 |                                 |     |                                                                                                                                                                                                                                                                                                                                       |                |
| 40 |                                 |     |                                                                                                                                                                                                                                                                                                                                       |                |
| 41 |                                 |     |                                                                                                                                                                                                                                                                                                                                       |                |
| 42 |                                 |     |                                                                                                                                                                                                                                                                                                                                       |                |
| 43 |                                 |     |                                                                                                                                                                                                                                                                                                                                       |                |
| 44 |                                 |     |                                                                                                                                                                                                                                                                                                                                       |                |
| 45 |                                 |     |                                                                                                                                                                                                                                                                                                                                       |                |
| 46 |                                 |     |                                                                                                                                                                                                                                                                                                                                       |                |



1  
2  
3  
4  
5  
6  
7  
8  
9  
10  
11  
12  
13  
14  
15  
16  
17  
18  
19  
20  
21  
22  
23  
24  
25  
26  
27  
28  
29  
30  
31  
32  
33  
34  
35  
36  
37  
38  
39  
40  
41  
42  
43  
44  
45  
46

|                               |     |                                                                                                                                                                                                                                                                                     |                                          |
|-------------------------------|-----|-------------------------------------------------------------------------------------------------------------------------------------------------------------------------------------------------------------------------------------------------------------------------------------|------------------------------------------|
| Confidentiality               | 27  | How personal information about potential and enrolled participants will be collected, shared, and maintained in order to protect confidentiality before, during, and after the trial                                                                                                | 20                                       |
| Declaration of interests      | 28  | Financial and other competing interests for principal investigators for the overall trial and each study site                                                                                                                                                                       | 21                                       |
| Access to data                | 29  | Statement of who will have access to the final trial dataset, and disclosure of contractual agreements that limit such access for investigators                                                                                                                                     | 20                                       |
| Ancillary and post-trial care | 30  | Provisions, if any, for ancillary and post-trial care, and for compensation to those who suffer harm from trial participation                                                                                                                                                       | 20                                       |
| Dissemination policy          | 31a | Plans for investigators and sponsor to communicate trial results to participants, healthcare professionals, the public, and other relevant groups (eg, via publication, reporting in results databases, or other data sharing arrangements), including any publication restrictions | 20                                       |
|                               | 31b | Authorship eligibility guidelines and any intended use of professional writers                                                                                                                                                                                                      | Not applicable                           |
|                               | 31c | Plans, if any, for granting public access to the full protocol, participant-level dataset, and statistical code                                                                                                                                                                     | Not applicable                           |
| <b>Appendices</b>             |     |                                                                                                                                                                                                                                                                                     |                                          |
| Informed consent materials    | 32  | Model consent form and other related documentation given to participants and authorised surrogates                                                                                                                                                                                  | Available if requested (not in protocol) |
| Biological specimens          | 33  | Plans for collection, laboratory evaluation, and storage of biological specimens for genetic or molecular analysis in the current trial and for future use in ancillary studies, if applicable                                                                                      | Not applicable                           |

---

\*It is strongly recommended that this checklist be read in conjunction with the SPIRIT 2013 Explanation & Elaboration for important clarification on the items. Amendments to the protocol should be tracked and dated. The SPIRIT checklist is copyrighted by the SPIRIT Group under the Creative Commons "[Attribution-NonCommercial-NoDerivs 3.0 Unported](https://creativecommons.org/licenses/by-nc-nd/3.0/)" license.

# BMJ Open

## Effects of exergames training on Postural Balance in chronic stroke patients: study protocol for a randomized controlled trial

|                                 |                                                                                                                                                                                                                                                                                                                                                                                                                                                                                                                                                                   |
|---------------------------------|-------------------------------------------------------------------------------------------------------------------------------------------------------------------------------------------------------------------------------------------------------------------------------------------------------------------------------------------------------------------------------------------------------------------------------------------------------------------------------------------------------------------------------------------------------------------|
| Journal:                        | <i>BMJ Open</i>                                                                                                                                                                                                                                                                                                                                                                                                                                                                                                                                                   |
| Manuscript ID                   | bmjopen-2020-038593.R1                                                                                                                                                                                                                                                                                                                                                                                                                                                                                                                                            |
| Article Type:                   | Protocol                                                                                                                                                                                                                                                                                                                                                                                                                                                                                                                                                          |
| Date Submitted by the Author:   | 12-Aug-2020                                                                                                                                                                                                                                                                                                                                                                                                                                                                                                                                                       |
| Complete List of Authors:       | Bessa, Nathalia; UFRN, Lima Filho, Bartolomeu; Federal University of Rio Grande do Norte, Department of Physical Therapy<br>Medeiros, Candice; Federal University of Rio Grande do Norte, Department of Physical Therapy<br>Ribeiro, Tatiana; Federal University of Rio Grande do Norte, Department of Physical Therapy; Federal University of Rio Grande do Norte<br>Campos, Tânia; Federal University of Rio Grande do Norte, Department of Physical Therapy<br>Cavalcanti, Fabrícia; Federal University of Rio Grande do Norte, Department of Physical Therapy |
| <b>Primary Subject Heading</b>: | Neurology                                                                                                                                                                                                                                                                                                                                                                                                                                                                                                                                                         |
| Secondary Subject Heading:      | Rehabilitation medicine, Sports and exercise medicine                                                                                                                                                                                                                                                                                                                                                                                                                                                                                                             |
| Keywords:                       | Stroke < NEUROLOGY, REHABILITATION MEDICINE, Neurology < INTERNAL MEDICINE                                                                                                                                                                                                                                                                                                                                                                                                                                                                                        |
|                                 |                                                                                                                                                                                                                                                                                                                                                                                                                                                                                                                                                                   |

SCHOLARONE™  
Manuscripts



I, the Submitting Author has the right to grant and does grant on behalf of all authors of the Work (as defined in the below author licence), an exclusive licence and/or a non-exclusive licence for contributions from authors who are: i) UK Crown employees; ii) where BMJ has agreed a CC-BY licence shall apply, and/or iii) in accordance with the terms applicable for US Federal Government officers or employees acting as part of their official duties; on a worldwide, perpetual, irrevocable, royalty-free basis to BMJ Publishing Group Ltd ("BMJ") its licensees and where the relevant Journal is co-owned by BMJ to the co-owners of the Journal, to publish the Work in this journal and any other BMJ products and to exploit all rights, as set out in our [licence](#).

The Submitting Author accepts and understands that any supply made under these terms is made by BMJ to the Submitting Author unless you are acting as an employee on behalf of your employer or a postgraduate student of an affiliated institution which is paying any applicable article publishing charge ("APC") for Open Access articles. Where the Submitting Author wishes to make the Work available on an Open Access basis (and intends to pay the relevant APC), the terms of reuse of such Open Access shall be governed by a Creative Commons licence – details of these licences and which [Creative Commons](#) licence will apply to this Work are set out in our licence referred to above.

Other than as permitted in any relevant BMJ Author's Self Archiving Policies, I confirm this Work has not been accepted for publication elsewhere, is not being considered for publication elsewhere and does not duplicate material already published. I confirm all authors consent to publication of this Work and authorise the granting of this licence.

1 **Effects of exergames training on Postural Balance in chronic**  
2 **stroke patients: study protocol for a randomized controlled trial**

3  
4 Nathalia Priscilla Oliveira Silva Bessa<sup>1</sup>; Bartolomeu Fagundes de Lima Filho<sup>1</sup>;  
5 Candice Simões Pimenta de Medeiros<sup>1</sup>; Tatiana Souza Ribeiro<sup>1</sup>; Tânia  
6 Fernandes Campos<sup>1</sup>; Fabrícia Azevedo da Costa Cavalcanti<sup>1</sup>.

7  
8 <sup>1</sup> Department of Physical Therapy, Federal University of Rio Grande do Norte,  
9 Natal, Brazil.

10  
11 \*Corresponding author: Nathalia Priscilla Oliveira Silva Bessa. Laboratory of  
12 Virtual Reality, Department of Physical Therapy, Federal University of Rio  
13 Grande do Norte, Senador Salgado Filho Av, 3000, Natal, Rio Grande do Norte,  
14 Brazil. Email: [nathyzinhasilva@gmail.com](mailto:nathyzinhasilva@gmail.com)

15  
16 **Date:** 11 Aug 2020

17  
18 **Version:** 2

19  
20 **Word Count:** 4282

## 22 **Abstract**

23 **Introduction:** Exergames training, as an additional therapy to standard care,  
24 has been widely used for motor recovery after stroke patients, and it is a  
25 valuable and positive tool in the rehabilitation of this population. This study  
26 describes a single-blind randomized clinical trial that will aim to investigate the  
27 effects of exergames training on postural balance in patients with chronic  
28 stroke.

29 **Methods and analysis:** Forty-two individuals with chronic stroke (> 6 months),  
30 aged 20 to 75 years, will be randomized into two groups: the experimental  
31 group, which will be subjected to an exergames protocol, and control group,  
32 which will undergo a kinesiotherapy protocol. Both protocols are based on  
33 postural balance. The intervention will consist of 40-minute sessions twice a  
34 week for 10 consecutive weeks. The volunteers will be evaluated before the  
35 treatment, at the end of the interventions, and 8 weeks thereafter. The primary  
36 outcome will be postural balance (Berg Balance Scale, Functional Reach Test,  
37 Timed Up and Go test, and Center of Pressure variables), and secondary  
38 outcomes will include gait (6-m timed walk and Kinovea Software), cortical  
39 activation patterns (EEG Emotiv EPOC), functional independence (Functional  
40 Independence Measure), quality of life (Stroke-Specific Quality of Life Scale),  
41 and motivation (Intrinsic Motivation Inventory).

42 **Ethics and dissemination:** This protocol was approved by the Ethics  
43 Committee of the Federal University of Rio Grande do Norte (number:  
44 3.434.350). The results of the study will be disseminated to participants through  
45 social networks and will be submitted to a peer-reviewed journal and scientific  
46 meetings.

1  
2  
3 47 **Trial registration number:** RBR-78v9hx (Brazilian Registry of Clinical Trials –  
4  
5 48 ReBEC).

6  
7 49 **Keywords:** Stroke, Randomized Controlled Trial, Postural balance,  
8  
9 50 Rehabilitation, Physical therapy modalities, Video Games.  
10  
11

12  
13 51

## 14 52 **Strengths and limitations of this study**

- 15  
16 53 • This study will explore objective data of postural balance and gait  
17  
18 54 through the force platform and kinematic analysis.
- 19  
20 55 • This study is among the few that use EEG to assess brain activity in  
21  
22 56 stroke individuals undergoing an experimental protocol with exergames.
- 23  
24 57 • The results of this research can lead to improvements in the use of  
25  
26 58 exergames for postural balance in stroke rehabilitation.
- 27  
28 59 • This study should benefit participants not only in physical aspects but  
29  
30 60 also in psychological and social aspects.
- 31  
32 61 • Blinding of participants will be not possible because of the nature of the  
33  
34 62 intervention.  
35  
36  
37  
38  
39  
40  
41  
42  
43  
44  
45  
46  
47  
48  
49  
50  
51  
52  
53  
54  
55  
56  
57  
58  
59  
60

## 64 Introduction

65 According to the World Health Organization, cerebrovascular disease  
66 was the leading cause of death worldwide in 2016. Of those deaths, 5.78 million  
67 were directly attributed to stroke, making it the main non-communicable cause  
68 of death<sup>1</sup>. In Brazil, stroke resulted in approximately 100,000 deaths in 2014<sup>2</sup>,  
69 and data indicate that approximately 568,000 affected individuals suffer from  
70 severe disability, making stroke the leading cause of disability in adults<sup>3</sup>.

71 Following stroke, various aspects of balance function are altered, such as  
72 delay in regaining the ability to assume the standing posture, loss of balance,  
73 asymmetry between the right and left limbs, increased postural sway, and  
74 decreased weight bearing on the affected side<sup>4,5</sup>. Postural balance is important  
75 for functional tasks such as sitting, sit-to-stand, and walking. Dysfunction leads  
76 to alterations in weight distribution patterns, causing the paretic leg to take less  
77 load<sup>6</sup>. These changes increase the risk of falling, cause difficulties in executing  
78 functional activities, and cause reduction in performance of daily living activities,  
79 leading to a consequent reduction in social participation, which can aggravate  
80 the clinical situation<sup>7</sup>.

81 Underuse of the impaired limb results in suppression of the cortical  
82 representation of the affected limb and further inhibition of its use<sup>8</sup>. The  
83 existence of cortical neural resources specialized in capturing changes in  
84 postural stability, which have been detected by changes in  
85 electroencephalography (EEG), supports the idea that postural adjustments are  
86 not only due to muscle responses to disorders but also due to cortically  
87 controlled intentional movements that may be altered following stroke<sup>9</sup>.

1  
2  
3 88 One major component of stroke rehabilitation is exercise therapy,<sup>10</sup> and  
4  
5 89 motor skill learning is particularly attractive because practice-induced  
6  
7  
8 90 improvement of sensorimotor performance supports the development of new  
9  
10 91 aptitudes, providing the flexibility to adapt to changing conditions<sup>11</sup>.

12 92 From this perspective, exergames training has been widely used in  
13  
14 93 rehabilitation with the aim of improving sensorial, cognitive, psychological, and  
15  
16  
17 94 motor function<sup>12,13</sup>. They have been characterized as experiences that simulate  
18  
19 95 a real environment in which the user can interact with the scenario created by  
20  
21 96 the game through the involvement of multisensory aspects<sup>14</sup>. Exergames  
22  
23 97 applications have the potential to apply relevant concepts of neuroplasticity,  
24  
25 98 such as repetition, intensity, and task-oriented training of the paretic extremity<sup>7</sup>,  
26  
27 99 and may entrain several brain areas involved in motor planning and learning,  
28  
29  
30 100 thus leading to an enhanced motor performance in rehabilitation<sup>12,15,16</sup>.

32  
33 101 There are some evidences to suggest the effectiveness of exergames in  
34  
35 102 improving upper limb function and balance as an additional therapy to standard  
36  
37 103 care in stroke patients. Therefore, therapy based on exergames is a valuable  
38  
39 104 and positive tool for the rehabilitation of this population<sup>17,18</sup>.

41  
42 105 A meta-analysis by Lee *et al.* (2019) found moderate evidence to support  
43  
44 106 the effect of exergames training on improved lower limb function, including  
45  
46 107 balance and gait, to a similar degree as upper limb function in chronic stroke  
47  
48 108 patients, suggesting that this technique may be used as a complementary  
49  
50 109 treatment method alongside traditional rehabilitation therapy. However, most of  
51  
52 110 the studies in this meta-analysis increased the overall treatment time by adding  
53  
54 111 exergames training to conventional treatment, which may be the reason for the  
55  
56 112 observed outcomes<sup>19</sup>.



1  
2  
3 113 Considering the above evidence, it is paramount to investigate the  
4  
5 114 isolated effectiveness of exergames rehabilitation and its contributions to  
6  
7  
8 115 positive changes in postural balance in stroke patients, as this may provide  
9  
10 116 additional evidence for the rehabilitation process in this population. From this  
11  
12 117 perspective, it is hypothesized that training based on exergames improves  
13  
14 118 postural balance, cortical activation, functionality, quality of life, and motivation  
15  
16  
17 119 of patients with chronic stroke.

18  
19 120 The purpose of this study to investigate the effects of exergames training  
20  
21 121 on postural balance in patients with chronic stroke and to explore changes in  
22  
23  
24 122 cortical activation patterns, functionality, quality of life, and motivation.  
25  
26  
27 123

## 28 124 **Methods and Analysis**

### 29 125 **Design**

30  
31 126 A single-blind randomized controlled clinical trial that follows the  
32  
33 127 recommendations of the Standard Protocol Items: Recommendations for  
34  
35 128 Interventional Trials (SPIRIT)<sup>20</sup> will be carried out (Figure 1). . Participants will  
36  
37  
38 129 be randomized to receive the exergames protocol (experimental group, EG) and  
39  
40  
41 130 kinesiotherapy protocol (control group: CG) (Figure 2).

42  
43  
44  
45 131 [INSERT Image 1]

46 132 [INSERT Image 2]

47 133

### 48 49 134 **Participants**

50  
51 135 The study population will consist of forty-two chronic stroke patients who  
52  
53 136 live in the city of Natal or nearby. A volunteer selection will be carried out at the  
54  
55 137 stroke patient care centers in the city. The selection can also be carried out via  
56  
57  
58 138 spontaneous demand by the voluntary search of stroke patients after project  
59  
60

1  
2  
3 139 advertisement on social media. After this, the first telephone contact will be  
4  
5 140 made to clarify any questions from the participants, and the first screening for  
6  
7 141 inclusion will be performed.  
8  
9

10 142

### 11 143 **Inclusion and exclusion criteria**

12  
13  
14 144 The participants will be selected according to the following criteria: (1)  
15  
16 145 first episode of unilateral stroke (ischemic or hemorrhagic); (2) postural balance  
17  
18 146 deficits (Berg Balance Scale score -BBS) <45)<sup>21</sup>; (3) injury time ≥6 months; (4)  
19  
20 147 age between 20 and 75 years; (5) at maximum level 2 of the modified Ashworth  
21  
22 148 Scale to assess the spasticity of the paretic lower limb<sup>22</sup>; (6) good cognitive  
23  
24 149 status based on the Mini-Mental State Examination (MMSE) (≥19 for illiterate,  
25  
26 150 ≥24 for literate)<sup>23</sup>; (7) ability to walk without personal assistance indoors  
27  
28 151 (Functional Ambulation Category -FAC) scores ≥3)<sup>24</sup>; (8) clinically stable, with  
29  
30 152 no history of epilepsy or seizures in the last 6 months; (9) not having signs of  
31  
32 153 unilateral neglect or sensory or global aphasia as assessed by National Institute  
33  
34 154 Health Stroke Scale -NIHSS)<sup>25</sup>; (10) no uncorrected hearing and/or visual  
35  
36 155 impairments; (11) not participating in a balance treatment protocol; and (12)  
37  
38 156 ability to understand and obey simple motor commands.  
39  
40  
41  
42  
43

44 157 Exclusion criteria will include (1) presenting other clinical conditions  
45  
46 158 affecting balance and (2) pregnancy.  
47  
48

49 159

### 50 160 **Sample Size**

51  
52 161 Using an online calculator<sup>26</sup> and based on previous study values  
53  
54 162 (51.0±4.6 and 46.2±5.7)<sup>27</sup>, a total sample of 42 participants (21 in EG and 21 in  
55  
56 163 CG) will be sufficient to detect a clinically important difference between the  
57  
58  
59  
60

1  
2  
3 164 groups on the BBS. A statistical power of 80%, an alpha of 5% and a loss rate  
4  
5 165 of 10% were considered for the sample calculation.  
6  
7

8 166

### 10 167 **Randomization and blinding**

11  
12  
13 168 A randomization sequence will be generated by a computer<sup>28</sup> in 3 blocks  
14  
15 169 of 12 participants and 1 block of 6 participants, allowing participants to be  
16  
17 170 equally distributed between the 2 groups. This stage will be conducted by a  
18  
19 171 researcher who is not involved in the study, they will keep the randomization list  
20  
21 172 confidential until the end of the study, and will organize the allocation in  
22  
23 173 sequentially numbered opaque envelopes. These envelopes will be sealed, and  
24  
25 174 the randomization sequence will be enforced using color coding for the study  
26  
27 175 groups (blue and red), that will correspond to the protocol that will be executed.  
28  
29 176 The contents of each envelope will be revealed at the beginning of each  
30  
31 177 patient's training by the study therapists responsible for the intervention to  
32  
33 178 maintain allocation confidentiality. The same therapists involved in CG training  
34  
35 179 will perform training in the EG. The researcher responsible for evaluations will  
36  
37 180 be blinded to all intervention groups. The only variables that will be collected  
38  
39 181 during the training will be evaluated by the study therapists (non-blind).  
40  
41 182 Statistical analysis will be performed by a blind researcher who will treat the  
42  
43 183 groups according to color, and the equivalence between groups and colors will  
44  
45 184 be revealed upon completion of the statistical analysis. The main researcher will  
46  
47 185 have access to the final trial dataset; this researcher will decide on terminating  
48  
49 186 the trial. All information about participants will be confidentiality before, during,  
50  
51 187 and after the trial.  
52  
53  
54  
55  
56  
57  
58  
59 188

## 189 **Evaluation procedures**

190 The researchers will be trained before data collection procedures to  
191 ensure reliability of measurements, and the participants will be submitted to  
192 assessment using all the instruments mentioned below.

## 194 **Measures**

### 195 **Sample characterization measures**

- 196 • **Cognition:** The MMSE is a validated instrument in Brazil used to assess  
197 cognitive function. The total score ranges from 0 to 30 points, and the  
198 higher the score, the better the cognitive ability. Values are interpreted  
199 according to educational status. Good cognitive status is considered with  
200 scores of 24 points or higher for literate persons and 19 or higher for  
201 illiterate persons<sup>23</sup>.
- 202 • **Ability to walk:** This will be evaluated by the FAC, which is a sensitive  
203 and reliable instrument for gait evaluation in stroke patients with  
204 hemiparesis<sup>24</sup> and ranks the ability to walk according to the amount of  
205 physical support required for the task. The score can vary from 0 (unable  
206 to walk or needs the help of 2 therapists) to 5 (independent in  
207 locomotion).
- 208 • **Spasticity:** The modified Ashworth scale allows the subjective  
209 assessment of muscle tone and classifies the affected segments from 0  
210 (normal tone) to 5 (rigid affected part)<sup>22</sup>.
- 211 • **Clinical and demographic data:** Personal, anthropometric, demographic,  
212 and pathological data (including, injury time, paretic side, stroke type),

1  
2  
3 213 and clinical history (history of falls, physical therapy treatment, and  
4  
5 214 previous use of exergames) will be collected.  
6  
7

8 215 • Neurological impairment: NIHSS is a specific instrument to assess the  
9  
10 216 severity of stroke via 10 items, and has been reported to have excellent  
11  
12 217 validity and reliability<sup>25</sup>.  
13  
14

15 218

### 17 219 **Outcome measures**

18  
19  
20 220 All outcome measures will be assessed in both intervention groups. The  
21  
22 221 primary outcome measures considered in this study are as follows:  
23

#### 24 222 **Postural Balance:**

25  
26 223 • Berg Balance Scale: BBS is a valid and reliable instrument for measuring  
27  
28 224 both the static and dynamic aspects of balance in people after stroke.  
29  
30 225 BBS scores range from 0 to 56, and values below 45 points are  
31  
32 226 predictive of falls, indicating a significant change in balance<sup>21,29</sup>. In the  
33  
34 227 present study, test scores with the paretic limb positioned behind will be  
35  
36 228 used in item 13 and unipodal support over the paretic limb will be used in  
37  
38 229 item 14, minimizing the ceiling effect in individuals with better balance<sup>30</sup>.  
39  
40

41  
42 230 • Functional Reach Test (FRT): FRT assesses a patient's stability by  
43  
44 231 measuring the maximum forward distance an individual can reach while  
45  
46 232 standing in a fixed position. It is widely used to identify the risk of  
47  
48 233 falling<sup>31</sup>. Displacements < 15 cm indicate patient fragility and risk of  
49  
50 234 falls<sup>32</sup>.  
51

52  
53 235 • Timed up and Go (TUG) test: It is a valid instrument for assessing  
54  
55 236 mobility and functional balance involving power, speed, and agility<sup>33</sup>.  
56  
57 237 Performing the test within 10 seconds is considered normal for healthy,  
58  
59  
60

1  
2  
3 238 independent adults without the risk of falls. Values from 11 to 20 seconds  
4  
5 239 are expected for disabled or frail elderly people with partial independence  
6  
7 240 and a low risk of falls. Values > 20 seconds suggest significant physical  
8  
9 241 mobility deficits and risk of falls<sup>34</sup>.

11  
12 242 Center of Pressure (CoP) variables: Data for total displacement,  
13  
14 243 anteroposterior, and midlateral velocity of the CoP will be assessed using  
15  
16 244 the gold standard equipment for balance assessment, the force platform  
17  
18 245 (FP)<sup>35</sup>. The Bertec® model 4060 connected to an external amplifier  
19  
20 246 (Bertec® AM651X) will be used.  
21  
22  
23

24 247

25  
26 248 The secondary outcome measures considered in this study are as follows:  
27

28 249

### 30 250 **Cortical Activation Pattern**

31  
32  
33 251 Alpha and beta waves will be evaluated based on their relationship with  
34  
35 252 the motor learning process<sup>36</sup>, using the Emotiv EPOC® portable 14 sensor  
36  
37 253 electroencephalography (EEG) device, a gyroscope capable of detecting  
38  
39 254 changes in the movement performed.  
40  
41

42 255

### 44 256 **Gait kinematic analysis**

45  
46  
47 257 The spatiotemporal and angular gait variables will be evaluated using the 6-  
48  
49 258 m timed walk test and Kinovea® software.

- 50  
51 259
- 52 • Six-meter timed walk (6MTW): It is a valid and reliable test for the  
53  
54 260 assessment of the walking ability of patients with stroke<sup>37</sup>. Gait speed  
55  
56 261 should be self-selected and considered comfortable and usual for the  
57  
58  
59  
60

1  
2  
3 262 participant. Studies show variation in mean habitual speed (0.45 m/s -  
4  
5 263 0.78 m/s) of gait in individuals with hemiparesis<sup>38,39</sup>.

6  
7  
8 264 • Software Kinovea®: Kinematic evaluation will be performed during gait  
9  
10 265 video capture (6MTW) using the Sony DCR-DVD850 digital cam, 2.7/6.7  
11  
12 266 cm LCD screen, and 60x optical zoom. Data will later be exported to  
13  
14 267 Kinovea® 0.8.15 software for paretic lower limb angle and gait speed  
15  
16  
17 268 analysis. This is a public domain video editing and analysis software that  
18  
19 269 is valid, reliable, and capable of accurately measuring distances up to 5  
20  
21 270 m from the object<sup>40</sup>.

22  
23  
24 271

## 25 26 272 **Functional independence**

27  
28 273 The Functional Independence Measure (FIM) scale is used because of  
29  
30 274 its reliability, validity, precision, and feasibility criteria. It is composed of 18  
31  
32 275 items, including motor and cognitive items. Here the patient's answers are  
33  
34 276 valued from 1 (total dependent) to 7 (complete independence), and the total  
35  
36 277 punctuation ranges between 18 and 126. For this research, the FIM will be  
37  
38 278 applied exclusively to the motor items, limiting the minimum score to 13 and the  
39  
40 279 maximum to 91 points<sup>41</sup>.

41  
42  
43  
44 280

## 45 46 281 **Quality of life**

47  
48 282 Quality of life perception will be assessed through a quality-of-life  
49  
50 283 assessment scale for stroke (Stroke-Specific Quality of Life Scale [SS-QoL]). It  
51  
52 284 is valid and reliable in assessing the quality of life after stroke in the Brazilian  
53  
54 285 population and has 49 items distributed over 12 domains<sup>42</sup>.

55  
56  
57  
58 286  
59  
60

## 287 **Motivation**

288 The intrinsic motivation inventory (IMI) is a multidimensional  
289 measurement with 6 subscales used to assess the subjective experiences of  
290 participants when developing an activity and attends to the reliability and validity  
291 criteria. According to the inventory, instruction participants ranked their  
292 agreement with each statement on a Likert scale of 1 (“not at all true”) to 7  
293 (“very true”)<sup>43</sup>.

294

## 295 **Participant monitoring measures**

296 Participants will be monitored during interventions using the following  
297 measures:

- 298 • Cardiovascular parameter variables: Heart rate (HR) will be checked  
299 using a portable oximeter and blood pressure (BP) using a  
300 sphygmomanometer (Visomat Comfort III®, Incoterm, São Paulo, Brazil) on  
301 the non-paretic arm.
- 302 • Adverse symptoms, perceived effort, and pain: Information regarding  
303 headache, vomiting, and dizziness will be collected. Quantification of  
304 perceived effort and pain will be used as indicators to monitor exercise  
305 tolerance through the CR-10 (Category-Ratio Scale) Borg Scale<sup>44</sup> modified  
306 by Foster *et al.* <sup>45</sup> (2001).

307

## 308 **Adverse events**

309 Additional information such as hospitalizations, falls, out-of-routine  
310 medical consultation, medication change, new diagnosis, and presence of  
311 adverse events will be collected during the follow-up.



312

313 **Interventions**

314 The protocols in both groups will be performed individually through 40-  
 315 minute sessions twice a week for 10 weeks (total of 20 sessions), totaling 13  
 316 hours of intervention<sup>12,17,46</sup>. The same outcome measures and motivation will be  
 317 collected again at the end of the interventions (post-training) and after 8 weeks  
 318 of the end of the interventions (follow-up). All participants will be instructed not  
 319 to perform any other physical activity that works on body balance during the  
 320 study period.

321 During each session, absences, manifestations of adverse symptoms,  
 322 and occurrence of imbalance and/or falls will be recorded. Interventional  
 323 modifications will be performed according to the patient's level of adaptation  
 324 involving optimization of time or number of repetitions, and/or rest time  
 325 enlargement, and all will be registered.

326 Both groups will begin their protocols with adapted lower limb strength  
 327 training for 10 minutes<sup>47,48</sup> as described in Table 1. Each exercise should be  
 328 performed with respect to the patient's level of adaptation and evolution will  
 329 occur in the 6th and 13th sessions using the materials described.

330

331 **Table 1.** Lower limb strengthening exercises.

| Exercise                          | Evolution                            | Materials Used                                                       | Sets                                         |
|-----------------------------------|--------------------------------------|----------------------------------------------------------------------|----------------------------------------------|
| 1. Get up and sit on a chair      | Surface change                       | 1 or 2 mats to create an unstable surface (H: 3 x W: 43 x L: 93 cm). | 2 sets of 60 seconds with 30 seconds of rest |
| 2. Go up and down steps           | Increase the step height; add weight | Larger step and 1 kg shin pad.                                       |                                              |
| 3. Strengthening of hip extensors | Add weight                           | 1 kg and 2 kg shin pad.                                              |                                              |

4. Tiptoe rise                      Add weight                      1 kg and 2 kg shin pad.

332 Source: Adapted from Allet et al. (2010).

333

### 334 **Control Group**

335                      Participants in the CG will receive a kinesiotherapy protocol (30 minutes)  
336 (Table 2), focusing on balance based on previous studies, and that promotes  
337 stimuli similar to the EG, selected so they demand identical motor sensors in  
338 both intervention environments, real and virtual<sup>47-50</sup>. Two progressions will  
339 happen, in the 6th and 13th sessions.

340

341 **Table 2.** Kinesiotherapeutic protocol exercises.

| Exercise                                             | Evolution                                                                       | Materials Used           | Sets**               |
|------------------------------------------------------|---------------------------------------------------------------------------------|--------------------------|----------------------|
| 1. Gait training on a stable surface.                | Gait training on an unstable surface using mats; addition of shin pads of 1 kg. | Mat* and 1 kg shin pads. | 2 sets of 3 minutes  |
| 2. Laterolateral weight transfer and discharge.      | Addition of 1 and 2 mats respectively.                                          | Mat                      | 3 sets of 60 seconds |
| 3. Anteroposterior weight transfer and discharge.    | Addition of 1 and 2 mats respectively.                                          | Mat                      | 3 sets of 60 seconds |
| 4. Laterolateral cephalic movement with eyes open.   | Same movement with eyes closed.<br>Added an exercise mat.                       | Mat                      | 3 sets of 60 seconds |
| 5. Anteroposterior cephalic movement with eyes open. | Same movement with eyes closed.<br>Added an exercise mat.                       | Mat                      | 3 sets of 60 seconds |
| 6. Dissociation of scapular and pelvic girdles.      | Addition of 1 and 2 mats respectively.                                          | Mat                      | 3 sets of 2 minutes  |

342 Source: Adapted from Nascimento, Patrizzi, Oliveira (2012); Soares, Sachelli (2008);  
343 Allet et al. (2010) e Ribeiro (2015). Legend: \*The mats (height: 3 x width: 43 x length:  
344 93 cm) will be used to create an unstable surface; \*\*For each series performed, the  
345 participant will be entitled to 30 seconds of rest.

346

### 347 **Experimental Group**

348 Participants in the EG will receive seven Wii Fit Plus exergames on the  
 349 Nintendo Wii® (30 minutes) (Table 3). This will use the Wii Balance Board  
 350 (WBB) accessory, a multimedia projector, and the Wii Remote Controller.  
 351 Initially, participants will have a moment to adapt to Nintendo Wii and its  
 352 components. It is expected that the participants in this group will be able to deal  
 353 satisfactorily with the games used in the protocol after adaptation. Otherwise,  
 354 they will enter the non-adherence criteria.

355  
 356 **Table 3.** Exergames protocol exercises.

| Game              | Description                                                                                                                                                                                                                                         | Progression                                        |
|-------------------|-----------------------------------------------------------------------------------------------------------------------------------------------------------------------------------------------------------------------------------------------------|----------------------------------------------------|
| 1. Free Run       | Control in patient's pocket "marching" on firm surface                                                                                                                                                                                              | Addition of 1 and 2 mats* respectively             |
| 2. Soccer Heading | On WBB; performs anteroposterior and laterolateral weight transfer to virtually "hit" the head on the ball, with an attempt of 180 s and a throw of 80 balls                                                                                        | Addition of 1 and 2 mats respectively              |
| 3. Pinguim Slide  | On WBB; performs laterolateral weight transfer in order to "catch" the largest number of fish, with 3 attempts of 60 s                                                                                                                              | Addition of 1 and 2 mats respectively              |
| 4. Ski Slalom     | On WBB; performs laterolateral weight transfer for the purpose of deflecting obstacles, and anteroposterior weight transfers to control speed while skiing on the mountain, with three 60-s attempts                                                | Addition of 1 and 2 mats respectively              |
| 5. Table Tilt     | On WBB; performs small laterolateral and anteroposterior displacements as a simulation of an unstable board to place the balls inside holes, with 3 attempts of initial 30 s. You gain 20 s every 1 level you reach so that you do not exceed 180 s | Addition of 1 and 2 mats respectively              |
| 6. Free Steps     | Up and down WBB, alternating feet with eyes open for 180 s                                                                                                                                                                                          | Addition of weights of 1 kg and 2 kg, respectively |

---

|                      |                                                                                                                                                    |                                          |
|----------------------|----------------------------------------------------------------------------------------------------------------------------------------------------|------------------------------------------|
| 7. Balance<br>Bubble | On WBB; performs laterolateral and<br>anteroposterior body displacement without the<br>bubble touching the banks of the virtual river for<br>180 s | Addition of 1 and 2<br>mats respectively |
|----------------------|----------------------------------------------------------------------------------------------------------------------------------------------------|------------------------------------------|

---

357 Legend: Each game will be executed for 3 minutes with a rest interval of approximately  
358 1 minute; \*The mats (height: 3 × width: 43 × length: 93 cm) will be used to create an  
359 unstable surface.  
360

361 The games were pre-established with focus on balance, and demands  
362 similar to that of the kinesiotherapy protocol: saccadic stimulation,  
363 visuovestibular cephalic movement, proprioceptive stimulus, dynamic balance  
364 training, static gait, ankle and hip strategies, fine CoP control, stimulus  
365 optokinetic, double task (motor), and motor coordination<sup>51-53</sup>. All scores  
366 obtained in games will be noted. Progression will occur upon adaptation of the  
367 patient, 2 evolutions will occur, in the 6th and 13th sessions.

### 369 Adherence

370 Participants will be contacted by telephone to confirm assessment and  
371 training sessions to avoid sample loss. Strategies to improve adherence include  
372 making up for missed sessions and interventions of motivated professionals.  
373 Regardless of the protocol, the criteria for non-adherence will be considered as  
374 follows: (1) absence > 30% of the intervention, consecutively and without make-  
375 up sessions; (2) presenting persistent pain or severe discomfort (headache,  
376 vomiting, dizziness, etc.), which prevents continuity in performing the proposed  
377 protocol in future sessions (or both); (3) presenting hemodynamic instability:  
378 decompensation of systemic arterial pressure (systolic and diastolic values >  
379 200 mmHg and 110 mmHg, respectively)<sup>54</sup> and HR above the submaximal  
380 values allowed during the training maintained even after pauses, calculated by

1  
2  
3 381 means of the formula  $[HR_{sub} = 0.75 \times (220 - age)]^{55}$ ; and (3) those who did not  
4  
5 382 adapt to the proposed intervention.  
6  
7  
8 383

9  
10 384 **Data acquisition**

11  
12 385 For data collection of the CoP variables, 6 static balance tests will be  
13  
14 386 performed on the FP based on their complexity variation and common use in  
15  
16 387 the literature<sup>56,57</sup>: bipodal support on a stable surface with eyes open and eyes  
17  
18 388 closed for 30 s each; unipodal support of paretic limbs on a stable surface with  
19  
20 389 eyes open and eyes closed for 30 s each; unipodal support of non-paretic limb  
21  
22 390 on a stable surface with eyes open and eyes closed for 10 s each. The distance  
23  
24 391 between the patients' feet will be standardized<sup>51</sup> and in unipodal support tasks,  
25  
26 392 the contralateral knee may be slightly flexed, and there may be no contact  
27  
28 393 between the raised and support legs. Each test can have 1 successful attempt  
29  
30 394 and a maximum of 3 unsuccessful attempts. The attempt is considered invalid if  
31  
32 395 the participant moves their support leg or touches the floor with the contralateral  
33  
34 396 leg<sup>58</sup>.  
35  
36  
37  
38  
39

40 397 For gait analysis during 6MTW, the camera will be positioned  
41  
42 398 perpendicular to the plane of motion, at a height of 1 m and 3 m away from the  
43  
44 399 subject to capture the gait pattern of the hemiparetic side, and will be  
45  
46 400 considered as a complete gait cycle. Markers will be placed on the main bone  
47  
48 401 references of the paretic lower limb (greater trochanter of the femur, lateral tibial  
49  
50 402 condyle, lateral fibular malleolus, fifth metatarsal head, and lateral calcaneal  
51  
52 403 bone tuberosity) for further analysis.  
53  
54

55  
56 404 For encephalographic recording during the FP static balance and walking  
57  
58 405 tests, the Emotiv Epoc headset will be positioned on the user's head according  
59  
60

1  
2  
3 406 to the international placement in the 10-20 positioning system following the  
4  
5 407 manufacturer's specifications<sup>59</sup>.  
6  
7  
8 408  
9  
10 409

## 11 410 **Data processing**

12  
13  
14 411 The Bertec® Model 4060 platform will be synchronized with Qualisys  
15  
16 412 Motion Capture Systems (Qualisys Medical AB, 411 13 Gothenburg, Sweden),  
17  
18 413 and through that system software, Qualisys Track Manager, data for CoP will be  
19  
20 414 collected and converted to MATLAB compatible files ( Mathworks, Natick, RI,  
21  
22 415 USA). The sampling rate will be 40 Hz, and a Butterworth bandpass filter with a  
23  
24 416 cutoff frequency of 15 Hz will be applied to eliminate noise contamination.  
25  
26  
27

28 417 For kinematic analysis, the videos will be converted to an Audio Video  
29  
30 418 Interleave (AVI) file extension and exported to Kinovea software. The hip, knee,  
31  
32 419 and dorsiflexion flexion angles will be evaluated in the middle oscillatory phase  
33  
34 420 of gait, using the following joints: hip, tibiofemoral metatarsophalangeal, and  
35  
36 421 calcaneal. Emotiv EPOC data processing will follow the model used by Oliveira  
37  
38 422 *et al.*<sup>60</sup> (2018). The encephalographic recording will take place during gait and  
39  
40 423 static balance tests, using 10 s of single-leg support activity and a central 10-s  
41  
42 424 cutout in bipodal support activities.  
43  
44  
45  
46  
47  
48

## 49 426 **Statistical analysis**

50  
51 427 The SPSS (Statistical Package Social Science) V.21.0 software program  
52  
53 428 will be used, and a significance level of 5% and CI of 95% will be implemented  
54  
55 429 for all statistical analyses. A descriptive analysis of the sample characterization  
56  
57 430 variables will be performed through central tendency and dispersion measures.  
58  
59  
60

1  
2  
3 431 Normality tests (Kolmogorov-Smirnov) will be used for outcomes and will  
4  
5 432 be compared between groups within each training session by using intergroup  
6  
7 433 comparisons, t tests for independent samples, or Mann–Whitney U tests. A  
8  
9 434 mixed analysis of variance (ANOVA) with repeated measures will be used to  
10  
11 435 compare values and variations of outcome measures, comparing values  
12  
13 436 between groups and between baseline, post-training, and follow-up  
14  
15 437 assessments.

16  
17  
18  
19 438 The effect size will be calculated using GPower 3.1.9.3 (University of  
20  
21 439 Dusseldorf, Kiel, Germany). Cohen's d will be used to calculate the effect size  
22  
23 440 between the control and the experimental groups, and the partial eta squared  
24  
25 441 for intragroup analyzes<sup>61</sup>. Intention-to-treat analysis will be performed for  
26  
27 442 dropout data, considering the last data obtained from the participant.  
28  
29  
30

31 443

### 32 33 444 **Risk of Bias and Study Limitation**

34  
35 445 The present study has a low risk of selection bias due to randomization  
36  
37 446 and concealment of the allocation of participants; low risk of detection bias as  
38  
39 447 the outcome assessor will be blind; high risk of performance bias because the  
40  
41 448 participants will not be blind to the proposed therapies; reporting and attrition  
42  
43 449 biases do not apply because it is a protocol study<sup>62</sup>.

44  
45  
46 450 The proposed follow-up time (8 weeks) can be considered a potential  
47  
48 451 (minor) study limitation; it is not verified whether motor and neurophysiological  
49  
50 452 changes resulting from the proposed intervention will be maintained over a long  
51  
52 453 term (1 year). However, it is suggested that the effect of treatment with  
53  
54 454 Nintendo Wii can be maintained for at least 2 months after the intervention, with  
55  
56 455 improvements in motor recovery.  
57  
58  
59  
60

## 456 **Patient and public involvement**

457 Patients were not involved in the design of this trial, establishing the  
458 research question, or developing recruitment procedures. At the end of the  
459 study, the results will be reported to the participants in form of a lecture,  
460 showing the effects found in the studied variables. The results of the study will  
461 be disseminated to participants through social networks and will be submitted to  
462 a peer-reviewed journal and scientific meetings.

## 464 **Ethics and dissemination**

465 This research was approved by the Research Ethics Committee of the  
466 Federal University of Rio Grande do Norte, with protocol number 3.434.350 on  
467 July 3, 2019 and trial registration number RBR-78v9hx (Brazilian Registry of  
468 Clinical Trials). Participants will be informed of the study objectives, its risks and  
469 benefits, and when eligible for inclusion, if they agree to participate, must sign  
470 the informed consent before the study begins. They will be free to abandon the  
471 study at any time without the obligation to give any explanation.

472 There will be prior contact with individuals through social networks, when  
473 all information about the study will be presented as well as the Resolution No.  
474 466/2012 of the Brazilian National Health Council of 2012, which provides  
475 guidelines and standards for research involving human participants. In case any  
476 negative effects occur, participants who suffer harm from trial participation will  
477 receive physical assistance according to the injury. The study results will be  
478 disseminated to participants through social networks and will be submitted to  
479 peer-reviewed journals and scientific meetings.

480



1  
2  
3 481 **Protocol amendments**  
4

5 482 Protocol amendments will be documented with descriptions of the  
6  
7 483 change and the date of the change.  
8  
9

10 484

11  
12 485 **Study status**  
13

14 486 Subject recruitment is underway, started in November 2019, but the first  
15  
16 487 inclusion was in January 2020. To date, eight patients were enrolled in the  
17  
18 488 study. The recruitment period spans till January 2021. The goal is to include 21  
19  
20 489 patients per treatment group, each patient completing the rehabilitation program  
21  
22 490 and evaluation before and after, and 8 weeks later.  
23  
24  
25

26 491

27  
28 492 **Acknowledgements**  
29

30 493 This study was financed in part by the Coordenação de Aperfeiçoamento  
31  
32 494 de Pessoal de Nível Superior – Brasil (CAPES) – Doctorate's degree  
33  
34 495 scholarship, Finance Code 001.  
35  
36

37 496

38  
39 497 **Authors' contributions**  
40

41  
42 498 NPOSB led the study design and wrote the manuscript. BFLF, CSPM,  
43  
44 499 TSR, TFC, and FACC have made substantial contributions to the design of the  
45  
46 500 study. NPOSB and BFLF participate in participants' recruitment and data  
47  
48 501 collection. All authors reviewed and approved the manuscript.  
49  
50

51 502

52  
53 503 **Funding**  
54

55  
56 504 The authors have not declared a specific grant for this research from any  
57  
58 505 funding agency in the public, commercial, or not-for-profit sectors.  
59  
60

1  
2  
3 506 **Competing interests**  
4

5 507 None declared.  
6  
7  
8 508

9  
10 509 **References**  
11

- 12 510 1. World Health Organization. Global Health Estimates 2016: Deaths by  
13 Cause, Age, Sex, by Country and by Region, 2000-2016. Geneva, World  
14 511 Health Organization; 2018. Available from:  
15 512 [https://www.who.int/healthinfo/global\\_burden\\_disease/estimates/en/inde](https://www.who.int/healthinfo/global_burden_disease/estimates/en/index1.html)  
16 513 [x1.html](https://www.who.int/healthinfo/global_burden_disease/estimates/en/index1.html) Accessed 22 Nov 2019.  
17 514  
18 515 2. Brasil. Óbitos p/ Ocorrência segundo Causa - CID-BR-10. In:  
19 516 Informações de Saúde: Estatísticas vitais: mortalidade: Mortalidade geral  
20 517 – 1996 a 2014: Região e Unidade da Federação. Ministério da Saúde.  
21 518 2014. Available from: <http://www.datasus.gov.br> Accessed 22 Nov 2019.  
22 519  
23 520 3. Bensenor IM, Goulart AC, Szwarcwald CL, *et al.* Prevalence of stroke  
24 521 and associated disability in Brazil: National Health Survey – 2013. *Arq*  
25 522 *Neuropsiquiatr.* 2015;73:746–50. doi: 10.1590/0004-282X20150115  
26 523  
27 524 4. Dickstein R, Abulaffio N. Postural sway of the affected and non affected  
28 525 pelvis and leg in stance of hemiparetic patients. *Arch Phys Med Rehabil.*  
29 526 2000;81(3):364-7. doi: 10.1016/s0003-9993(00)90085-6.  
30 527  
31 528 5. de Haart M, Geurts AC, Dault MC, *et al.* Restoration of weight-shifting  
32 529 capacity in patients with post acute stroke: a rehabilitation cohort study.  
33 530 *Arch Phys Med Rehabil.* 2005; 86(4):755-62. doi:  
34 10.1016/j.apmr.2004.10.010.  
35  
36  
37  
38  
39  
40  
41  
42  
43  
44  
45  
46  
47  
48  
49  
50  
51  
52  
53  
54  
55  
56  
57  
58  
59  
60

- 1  
2  
3 531 controlled trial. *Hong Kong Physiotherapy Journal*. 2014;32:51-7.  
4  
5 532 doi.org/10.1016/j.hkpj.2014.04.002  
6  
7  
8 533 7. Langhorne P, Coupar F, Pollock A. Motor recovery after stroke: a  
9  
10 534 systematic review. *Lancet Neurol*. 2009;8:741–54. doi: 10.1016/S1474-  
11  
12 535 4422(09)70150-4.  
13  
14 536 8. Barato G, Fernandes T, Pacheco M. Cortical plasticity and neurological  
15  
16 537 physical therapy techniques in neuroimage optic. *Rev Neurocienc*.  
17  
18 538 2009;17(4):342-48.  
19  
20 539 9. Slobounov S, Hallett M, Stanhope S, *et al*. Role of cerebral cortex in  
21  
22 540 human postural control: an EEG study. *Clin Neurophysiol*. 2005;116:315-  
23  
24 541 23. doi: 10.1016/j.clinph.2004.09.007  
25  
26  
27 542 10. Kleim JA, Jones TA. Principles of experience-dependent neural plasticity:  
28  
29 543 implications for rehabilitation after brain damage. *J Speech Lang Hear*  
30  
31 544 *res*. 2008;51:225-39. doi: 10.1044/1092-4388(2008/018).  
32  
33  
34 545 11. Lefebvre S, Laloux P, Peeters A, *et al*. Dual-tDCS enhances online motor  
35  
36 546 skill learning and long-term retention in chronic stroke patients. *Front*  
37  
38 547 *Hum Neurosci*. 2013;6:343. doi: 10.3389/fnhum.2012.00343.  
39  
40  
41 548 12. Saposnik G, Cohen LG, Mamdani M, *et al*. Efficacy and safety of  
42  
43 549 nonimmersive virtual reality exercising in stroke rehabilitation (EVREST):  
44  
45 550 a randomised, multicentre, single blind, controlled trial. *Lancet Neurol*.  
46  
47 551 2016; 15(10):1019-27. doi: 10.1016/S1474-4422(16)30121-1.  
48  
49  
50 552 13. Park DS, Lee DG, Lee K, *et al*. Effects of virtual reality training using  
51  
52 553 Xbox Kinect on motor function in stroke survivors: a preliminary study. *J*  
53  
54 554 *Stroke Cerebrovasc Dis*. 2017;26:2313–19. doi:  
55  
56 555 10.1016/j.jstrokecerebrovasdis.2017.05.019.  
57  
58  
59  
60

- 1  
2  
3 556 14. Peñasco-Martín B, Reyes-Guzmán A, Gil-Agudo A, *et al.* Aplicación de la  
4  
5 557 realidad virtual en los aspectos motores de la neurorrehabilitación. *Rev*  
6  
7 558 *Neurol.* 2010;51: 481–88. doi: 10.33588/rn.5108.2009665.  
9  
10 559 15. Calabrò RS, Naro A, Russo M, *et al.* The role of virtual reality in  
11  
12 560 improving motor performance as revealed by EEG: a randomized clinical  
13  
14 561 trial. *J Neuroeng Rehabil.* 2017; 14(1):53. doi: 10.1186/s12984-017-  
15  
16 562 0268-4.  
17  
18 563 16. Rohrbach N, Chicklis E, Levac DE. What is the impact of user affect on  
19  
20 564 motor learning in virtual environments after stroke? A scoping review. *J*  
21  
22 565 *Neuroeng Rehabil.* 2019;16:79. doi: 10.1186/s12984-019-0546-4  
23  
24 566 17. Laver KE, Lange B, George S, *et al.* Virtual reality for stroke  
25  
26 567 rehabilitation. *Cochrane Database Syst Rev.* 2017; doi:  
27  
28 568 10.1002/14651858.CD008349.pub4.  
29  
30 569 18. Porrás DC, Siemonsma P, Inzelberg R, *et al.* Advantages of virtual reality  
31  
32 570 in the rehabilitation of balance and gait: systematic review. *Neurology*  
33  
34 571 2018;90:1017-25. doi: 10.1212/WNL.0000000000005603.  
35  
36 572 19. Lee HS, Park YJ, Park SW. The Effects of Virtual Reality Training on  
37  
38 573 Function in Chronic Stroke Patients: A Systematic Review and Meta-  
39  
40 574 Analysis. *Biomed Res. Int.* 2019; 1-12. doi: 10.1155/2019/7595639  
41  
42 575 20. Chan A-W, Tetzlaff JM, Gøtzsche PC, *et al.* SPIRIT 2013 Explanation  
43  
44 576 and Elaboration: Guidance for protocols of clinical  
45  
46 577 trials. *BMJ* 2013;346:e7586. doi:10.1136/bmj.e7586  
47  
48 578 21. Doğan A, Mengüllüoğlu M, Özgirgin N. Evaluation of the effect of ankle-  
49  
50 579 foot orthosis use on balance and mobility in hemiparetic stroke patients.  
51  
52 580 *Disabil Rehabil.* 2011;33:1433-9. doi: 10.3109/09638288.2010.533243.  
53  
54  
55  
56  
57  
58  
59  
60

- 1  
2  
3 581 22. Biering-Sørensen F, Nielsen JB, Klinge K. Spasticity-assessment: a  
4  
5 582 review. *Spinal cord* 2006;44:708-22. doi: 10.1038/sj.sc.3101928  
6  
7  
8 583 23. Folstein MF, Folstein SE, McHugh PR. Mini -Mental State: a practical  
9  
10 584 method for grading the cognitive state of patients for the clinician. *J*  
11  
12 585 *Psychiatr Res.* 1975; 12:189 -98.  
13  
14 586 24. Mehrholz J, Wagner K, Rutte K, *et al.* Predictive validity and  
15  
16  
17 587 responsiveness of the functional ambulation category in hemiparetic  
18  
19 588 patients after stroke. *Arch Phys Med Rehabil.* 2007;88:1314–9. doi:  
20  
21 589 10.1016/j.apmr.2007.06.764  
22  
23  
24 590 25. Brott T, Adams HP Jr, Olinger CP, *et al.* Measurements of acute cerebral  
25  
26 591 infarction: a clinical examination scale. *Stroke* 1989;20:864-70. doi:  
27  
28 592 10.1161/01.str.20.7.864  
29  
30  
31 593 26. Dean AG, Sullivan KM, Soe MM. OpenEpi: Open Source Epidemiologic  
32  
33 594 Statistics for Public Health. 2013. Available from:  
34  
35 595 <http://www.openepi.com/> Accessed 11 Mar 2019.  
36  
37  
38 596 27. Lloréns R, Gil-Gómez JA, Alcañiz M, *et al.* Improvement in balance using  
39  
40 597 a virtual reality-based stepping exercise: a randomized controlled trial  
41  
42 598 involving individuals with chronic stroke. *Clin Rehabil.* 2015; 29(3):261-8.  
43  
44 599 doi: 10.1177/0269215514543333.  
45  
46  
47 600 28. Dallal GE. Randomization.com. Web site Randomization.com. 2013.  
48  
49 601 Available from: <http://www.randomization.com>. Accessed 22 Mar 2019.  
50  
51  
52 602 29. Miyamoto ST, Lombardi Junior I, Berg KO, *et al.* Brazilian version of the  
53  
54 603 Berg balance scale. *Braz J Med Biol Res.* 2004;37:1411-4. doi:  
55  
56 604 10.1590/S0100-879X2004000900017  
57  
58  
59  
60

- 1  
2  
3 605 30.Zambaldi PA, Costa TABN, Diniz GCLM, *et al.* The effect of balance  
4  
5 606 training in a group of community-dwelling elderly women:a pilot study of  
6  
7 607 a specific, non-systematic and short-term approach. *Acta Fisiátrica*  
8  
9 608 2016;14:17-24. doi: 10.5935/0104-7795.20070001  
10  
11  
12 609 31.Duncan PW, Weiner DK, Chandler J, *et al.* Functional reach: a new  
13  
14 610 clinical measure of balance. *J Gerontol.* 1990;45:192-7. doi:  
15  
16 611 10.1093/geronj/45.6.m192  
17  
18 612 32.Silveira KRM, Matas SLA, Perracini MR. Assessment of performance in  
19  
20 613 the functional reach and lateral reach tests in a Brazilian population  
21  
22 614 sample. *Rev bras fisioter.* 2006;10:381-6. doi: 10.1590/S1413-  
23  
24 615 35552006000400004.  
25  
26 616 33.Dutra MC, Cabral AL, Carvalho GA. Brazilian Version of Timed Up and  
27  
28 617 Go Test. *Interfaces* 2016;3:81-8.  
29  
30 618 34.Bischoff HA, Stähelin HB, Monsch AU, *et al.* Identifying a cut-off point for  
31  
32 619 normal mobility: a comparison of the timed 'up and go'test in  
33  
34 620 community-dwelling and institutionalised elderly women. *Age Ageing.*  
35  
36 621 2003;32:315-20. doi: 10.1093/ageing/32.3.315  
37  
38 622 35.Duarte M, Freitas SMSF. Revision of posturography based on force plate  
39  
40 623 for balance evaluation. *Rev. bras. fisioter.* 2010;14:183-92. doi:  
41  
42 624 10.1590/S1413-35552010000300003.  
43  
44 625 36.Luft C, Andrade A. EEG and Motor Learning Research. *Rev Port Cien*  
45  
46 626 *Desp.* 2006;6:106-15.  
47  
48 627 37.Lam HSP, Lau FWK, Chan GKL, *et al.* The validity and reliability of a 6-  
49  
50 628 metre timed walk for the functional assessment of patients with  
51  
52  
53  
54  
55  
56  
57  
58  
59  
60

- 1  
2  
3 629 stroke. *Physiother Theory Pract.* 2010;26:251-5. doi:  
4  
5 630 10.3109/09593980903015235.  
6  
7  
8 631 38.Kinsella S, Moran K. Gait pattern categorization of stroke participants  
9  
10 632 with equinus deformity of the foot. *Gait & posture* 2008;27:144-51. doi:  
11  
12 633 10.1016/j.gaitpost.2007.03.008  
13  
14 634 39.Castro PMMA, de Magalhães AM, Cruz ALC, *et al.* Testes de equilíbrio e  
15  
16 635 mobilidade funcional na predição e prevenção de riscos de quedas em  
17  
18 636 idosos. *Rev bras geriatr gerontol.* 2015;18:129-40. doi: 10.1590/1809-  
19  
20 637 9823.2015.13208.  
21  
22  
23 638 40.Puig-Diví A, Escalona-Marfil C, Padullés-Riu JM, *et al.* Validity and  
24  
25 639 reliability of the Kinovea program in obtaining angles and distances using  
26  
27 640 coordinates in 4 perspectives. *PloS one* 2019;14:6. doi:  
28  
29 641 10.1371/journal.pone.0216448  
30  
31  
32  
33 642 41.Riberto M, Miyazaki MH, Jucá SS, *et al.* Validation of the Brazilian  
34  
35 643 version of Functional Independence. *Measure Acta fisiátrica* 2016;11:72-  
36  
37 644 6. doi:10.5935/0104-7795.20040003  
38  
39  
40  
41 645 42.Lima RCM, Teixeira-Salmela LF, Magalhães LC, *et al.* Psychometric  
42  
43 646 properties of the Brazilian version of the Stroke Specific Quality of Life  
44  
45 647 Scale: application of the Rasch model. *Braz J Phys Ther.* 2008;12:149-  
46  
47 648 56. doi: 10.1590/S1413-35552008000200012  
48  
49  
50  
51 649 43.Mcauley E, Duncan T, Tammen V. Psychometric Properties of the  
52  
53 650 Intrinsic Motivation Inventory in a Competitive Sport Setting: A  
54  
55 651 Confirmatory Factor Analysis. *Res Q Exerc Sport* 1989;60:48-58. doi:  
56  
57 652 10.1080/02701367.1989.10607413  
58  
59  
60

- 1  
2  
3 653 44. Borg G, Hassmén P, Lagerström M. Perceived exertion related to heart  
4  
5 654 rate and blood lactate during arm and leg exercise. *Eur J Appl Physiol*  
6  
7 655 *Occup Physiol.* 1987;56:679–85. doi: 10.1007/bf00424810  
8  
9  
10 656 45. Foster C, Florhaug JA, Franklin J, *et al.* A new approach to monitoring  
11  
12 657 exercise training. *J Strength Cond Res.* 2001; 15:109–15. doi:  
13  
14 658 10.1519/00124278-200102000-00019  
15  
16  
17 659 46. Galvao MLC, Gouvea PM, Ocamato GN, *et al.* Virtual reality effect on  
18  
19 660 upper limb motor function paretic in post stroke. *Rev Neurocienc.*  
20  
21 661 2015;23:493–8. doi: 10.4181/RNC.2015.23.04.1038.06p  
22  
23  
24 662 47. Allet L, Armand S, de Bie RA, *et al.* The gait and balance of patients with  
25  
26 663 diabetes can be improved: a randomised controlled trial. *Diabetologia*  
27  
28 664 2010;53:458-66. doi: 10.1007/s00125-009-1592-4.  
29  
30  
31 665 48. Soares MA, Sacchelli T. Effects of physical therapy on balance of elderly  
32  
33 666 people. *Rev Neurocienc.* 2008;16:97-100.  
34  
35  
36 667 49. Nascimento LCG, Patrizzi LJ, Oliveira CCES. Result of four weeks of  
37  
38 668 proprioceptive training in the studied postural balance of elderly. *Fisioter*  
39  
40 669 *mov.* 2012;25:325-31. doi: 10.1590/S0103-51502012000200010.  
41  
42  
43 670 50. Ribeiro KMOB, Oliveira BS, Ferreira LM, *et al.* Effectiveness of Otolith  
44  
45 671 Repositioning Maneuvers and Vestibular Rehabilitation exercises in  
46  
47 672 elderly people with Benign Paroxysmal Positional Vertigo: a systematic  
48  
49 673 review. *Braz J Otorhinolaryngol.* 2015;84:104-18. doi:  
50  
51 674 10.1016/j.bjorl.2017.06.003  
52  
53  
54 675 51. Karasu AU, Batur EB, Karataş GK. Effectiveness of Wii-Based  
55  
56 676 Rehabilitation in Stroke: A Randomized Controlled Study. *J Rehabil Med.*  
57  
58 677 2018;50:406-12. doi: 10.2340/16501977-2331.  
59  
60



- 1  
2  
3 678 52. Hung JW, Chou CX, Hsieh YW, *et al.* Randomized comparison trial of  
4  
5 679 balance training by using exergaming and conventional weight-shift  
6  
7 680 therapy in patients with chronic stroke. *Arch Phys Med Rehabil.*  
8  
9 681 2014;95(9):1629–37. doi: 10.1016/j.apmr.2014.04.029.  
10  
11  
12 682 53. Agmon M, Perry CK, Phelan E, *et al.* A pilot study of Wii Fit exergames  
13  
14 683 to improve balance in older adults. *J Geriatr Phys Ther.* 2011;34:161-7.  
15  
16 684 doi: 10.1519/JPT.0b013e3182191d98.  
17  
18  
19 685 54. Balady GJ, Chaitman B, Driscoll D, *et al.* American College of Sports  
20  
21 686 Medicine Position Stand and American Heart Association.  
22  
23 687 Recommendations for cardiovascular screening, staffing, and emergency  
24  
25 688 policies at health/fitness facilities. *Circulation.* 1998;97:2283–93.  
26  
27  
28  
29 689 55. Fox SM 3rd, Naughton JP, Haskell WL. Physical activity and the  
30  
31 690 prevention of coronary heart disease. *Ann Clin Res.* 1971;3:404–32.  
32  
33  
34 691 56. Scaglioni-solano P, Aragón-vargas LF. Validity and reliability of the  
35  
36 692 Nintendo Wii Balance Board to assess standing balance and sensory  
37  
38 693 integration in highly functional older adults. *Int J Rehabil Res.*  
39  
40 694 2014;37:138-43. doi: 10.1097/MRR.0000000000000046.  
41  
42  
43 695 57. Hytönen M, Pyykkö I, Aalto H, *et al.* Postural Control and Age. *Acta oto-*  
44  
45 696 *laryngologica* 1993;113:119-22. doi: 10.3109/00016489309135778  
46  
47  
48 697 58. Grabiner MD, Lundin TM, Feuerbach JW. Converting Chattecx Balance  
49  
50 698 System vertical reaction force measurements to center of pressure  
51  
52 699 excursion measurements. *Phys Ther.* 1993;73:316-9. doi:  
53  
54 700 10.1093/ptj/73.5.316  
55  
56  
57 701 59. EMOTIV. Emotiv software development kit user manual for release  
58  
59 702 1.0.0.3. HongKong: Emotiv Ltd, 2011.  
60

- 1  
2  
3 703 60.Oliveira SMS, Medeiros CSP, Pacheco TBF, *et al.*  
4  
5 704 Electroencephalographic changes using virtual reality program: technical  
6  
7 705 note condensed title: a study using a mobile EEG device. *Neurol Res.*  
8  
9 706 2018;40(3):160-5. doi: 10.1080/01616412.2017.1420584.  
10  
11  
12 707 61.Lakens D. Calculating and reporting effect sizes to facilitate cumulative  
13  
14 708 science: a practical primer for t-tests and ANOVAs. *Front psychol.*  
15  
16 709 2013;4:863. doi: 10.3389/fpsyg.2013.00863.  
17  
18  
19 710 62.Carvalho APV, Silva V, Grande AJ. Assessment of risk of bias in  
20  
21 711 randomized controlled trials by the Cochrane Collaboration tool. *Diagn*  
22  
23 712 *Tratamento.* 2013;18(1): 38-44. Available from:  
24  
25 713 <http://files.bvs.br/upload/S/1413-9979/2013/v18n1/a3444.pdf> Accessed  
26  
27 714 30 July 2020.  
28  
29  
30  
31 715  
32  
33  
34  
35  
36  
37  
38  
39  
40  
41  
42  
43  
44  
45  
46  
47  
48  
49  
50  
51  
52  
53  
54  
55  
56  
57  
58  
59  
60

1  
2  
3  
4  
5  
6  
7  
8  
9  
10  
11  
12  
13  
14  
15  
16  
17  
18  
19  
20  
21  
22  
23  
24  
25  
26  
27  
28  
29  
30  
31  
32  
33  
34  
35  
36  
37  
38  
39  
40  
41  
42  
43  
44  
45  
46  
47  
48  
49  
50  
51  
52  
53  
54  
55  
56  
57  
58  
59  
60

716 **Figure Legends**

717

718 **Figure 1.** Schedule of enrollment, interventions, and assessments. Legend:  $t_1$

719 1st week,  $t_{10}$  10th week,  $t_{\text{post}10}$  post-training,  $t_{18}$  18th week.

720

721 **Figure 2.** The schematic study design.

722

For peer review only

| TIMEPOINT                                          | STUDY PERIOD  |   |                   |                |          |
|----------------------------------------------------|---------------|---|-------------------|----------------|----------|
|                                                    | Pre-treatment |   | Post-allocation   | Post-treatment |          |
|                                                    | $-t_1$        | 0 | $t_1$ to $t_{10}$ | $t_{post10}$   | $t_{18}$ |
| <b>ENROLMENT:</b>                                  |               |   |                   |                |          |
| Eligibility screen                                 | X             |   |                   |                |          |
| Informed consent                                   | X             |   |                   |                |          |
| Allocation                                         |               | X |                   |                |          |
| <b>INTERVENTIONS:</b>                              |               |   |                   |                |          |
| <i>Control Group</i>                               |               |   |                   |                |          |
| <i>Experimental Group</i>                          |               |   |                   |                |          |
| <b>ASSESSMENTS:</b>                                |               |   |                   |                |          |
| <i>Postural balance deficits</i>                   | X             |   |                   |                |          |
| <i>Cognitive screening</i>                         | X             |   |                   |                |          |
| <i>Spasticity</i>                                  | X             |   |                   |                |          |
| <i>Ability to walk</i>                             | X             |   |                   |                |          |
| <i>Stroke severity</i>                             | X             |   |                   |                |          |
| <i>Clinical and demographic data</i>               |               | X |                   |                |          |
| <i>Cardiovascular parameter variables</i>          |               | X | X                 | X              | X        |
| <i>Adverse symptoms, perceived effort and pain</i> |               |   | X                 |                |          |
| <i>Postural balance</i>                            |               | X |                   | X              | X        |
| <i>Gait speed and kinematic analysis</i>           |               | X |                   | X              | X        |
| <i>Cortical Activation Patterns</i>                |               | X |                   | X              | X        |
| <i>Functional independence</i>                     |               | X |                   | X              | X        |
| <i>Quality of life</i>                             |               | X |                   | X              | X        |
| <i>Motivation</i>                                  |               |   |                   | X              |          |
| <i>Adverse events</i>                              |               |   |                   |                | X        |

Figure 1. Schedule of enrollment, interventions, and assessments. Legend:  $t_1$  1st week,  $t_{10}$  10th week,  $t_{post10}$  post-training,  $t_{18}$  18th week.

170x224mm (300 x 300 DPI)

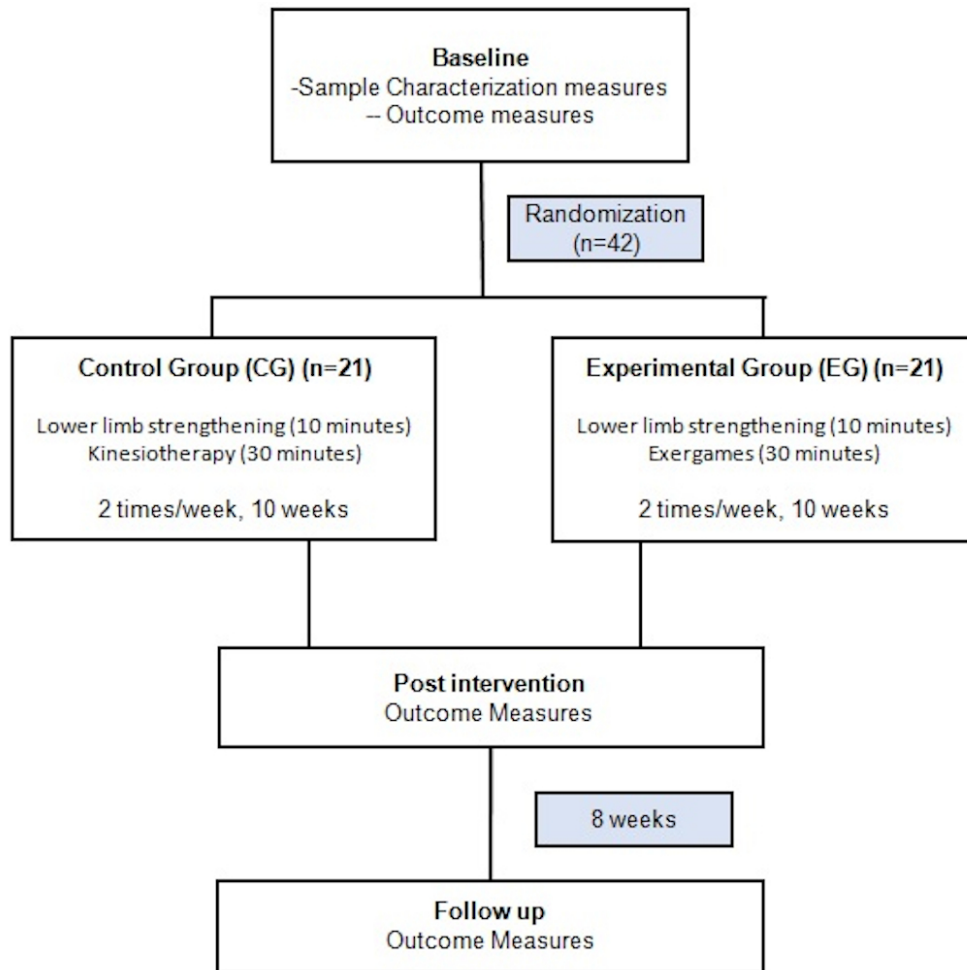

Figure 2. The schematic study design.

87x86mm (300 x 300 DPI)

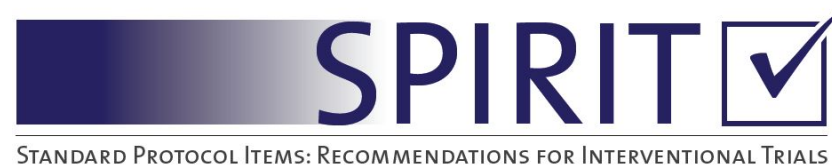

| Section/item                      | Item No | Description                                                                                                                                                                                                                                                                              | Addressed on page number |
|-----------------------------------|---------|------------------------------------------------------------------------------------------------------------------------------------------------------------------------------------------------------------------------------------------------------------------------------------------|--------------------------|
| <b>Administrative information</b> |         |                                                                                                                                                                                                                                                                                          |                          |
| Title                             | 1       | Descriptive title identifying the study design, population, interventions, and, if applicable, trial acronym                                                                                                                                                                             | 1                        |
| Trial registration                | 2a      | Trial identifier and registry name. If not yet registered, name of intended registry                                                                                                                                                                                                     | 2; 210                   |
|                                   | 2b      | All items from the World Health Organization Trial Registration Data Set                                                                                                                                                                                                                 | 20                       |
| Protocol version                  | 3       | Date and version identifier                                                                                                                                                                                                                                                              | 1                        |
| Funding                           | 4       | Sources and types of financial, material, and other support                                                                                                                                                                                                                              | 21                       |
| Roles and responsibilities        | 5a      | Names, affiliations, and roles of protocol contributors                                                                                                                                                                                                                                  | 1; 21                    |
|                                   | 5b      | Name and contact information for the trial sponsor                                                                                                                                                                                                                                       | 21                       |
|                                   | 5c      | Role of study sponsor and funders, if any, in study design; collection, management, analysis, and interpretation of data; writing of the report; and the decision to submit the report for publication, including whether they will have ultimate authority over any of these activities | Not applicable           |
|                                   | 5d      | Composition, roles, and responsibilities of the coordinating centre, steering committee, endpoint adjudication committee, data management team, and other individuals or groups overseeing the trial, if applicable (see Item 21a for data monitoring committee)                         | Not applicable           |
| <b>Introduction</b>               |         |                                                                                                                                                                                                                                                                                          |                          |
| Background and rationale          | 6a      | Description of research question and justification for undertaking the trial, including summary of relevant studies (published and unpublished) examining benefits and harms for each intervention                                                                                       | 4-6                      |

|    |                                                           |     |                                                                                                                                                                                                                                                                                                                                                                                |                                   |
|----|-----------------------------------------------------------|-----|--------------------------------------------------------------------------------------------------------------------------------------------------------------------------------------------------------------------------------------------------------------------------------------------------------------------------------------------------------------------------------|-----------------------------------|
| 1  |                                                           |     |                                                                                                                                                                                                                                                                                                                                                                                |                                   |
| 2  |                                                           |     |                                                                                                                                                                                                                                                                                                                                                                                |                                   |
| 3  |                                                           |     |                                                                                                                                                                                                                                                                                                                                                                                |                                   |
| 4  |                                                           | 6b  | Explanation for choice of comparators                                                                                                                                                                                                                                                                                                                                          | 4-6                               |
| 5  | Objectives                                                | 7   | Specific objectives or hypotheses                                                                                                                                                                                                                                                                                                                                              | 6                                 |
| 6  |                                                           |     |                                                                                                                                                                                                                                                                                                                                                                                |                                   |
| 7  | Trial design                                              | 8   | Description of trial design including type of trial (eg, parallel group, crossover, factorial, single group), allocation ratio, and framework (eg, superiority, equivalence, noninferiority, exploratory)                                                                                                                                                                      | 6; Figure 2                       |
| 8  |                                                           |     |                                                                                                                                                                                                                                                                                                                                                                                |                                   |
| 9  |                                                           |     |                                                                                                                                                                                                                                                                                                                                                                                |                                   |
| 10 |                                                           |     |                                                                                                                                                                                                                                                                                                                                                                                |                                   |
| 11 | <b>Methods: Participants, interventions, and outcomes</b> |     |                                                                                                                                                                                                                                                                                                                                                                                |                                   |
| 12 |                                                           |     |                                                                                                                                                                                                                                                                                                                                                                                |                                   |
| 13 | Study setting                                             | 9   | Description of study settings (eg, community clinic, academic hospital) and list of countries where data will be collected. Reference to where list of study sites can be obtained                                                                                                                                                                                             | 6; 7                              |
| 14 |                                                           |     |                                                                                                                                                                                                                                                                                                                                                                                |                                   |
| 15 | Eligibility criteria                                      | 10  | Inclusion and exclusion criteria for participants. If applicable, eligibility criteria for study centres and individuals who will perform the interventions (eg, surgeons, psychotherapists)                                                                                                                                                                                   | 7                                 |
| 16 |                                                           |     |                                                                                                                                                                                                                                                                                                                                                                                |                                   |
| 17 |                                                           |     |                                                                                                                                                                                                                                                                                                                                                                                |                                   |
| 18 | Interventions                                             | 11a | Interventions for each group with sufficient detail to allow replication, including how and when they will be administered                                                                                                                                                                                                                                                     | 13-17; Table 1; Table 2; Table 3. |
| 19 |                                                           |     |                                                                                                                                                                                                                                                                                                                                                                                |                                   |
| 20 |                                                           |     |                                                                                                                                                                                                                                                                                                                                                                                |                                   |
| 21 |                                                           |     |                                                                                                                                                                                                                                                                                                                                                                                |                                   |
| 22 |                                                           | 11b | Criteria for discontinuing or modifying allocated interventions for a given trial participant (eg, drug dose change in response to harms, participant request, or improving/worsening disease)                                                                                                                                                                                 | 14                                |
| 23 |                                                           |     |                                                                                                                                                                                                                                                                                                                                                                                |                                   |
| 24 |                                                           |     |                                                                                                                                                                                                                                                                                                                                                                                |                                   |
| 25 |                                                           | 11c | Strategies to improve adherence to intervention protocols, and any procedures for monitoring adherence (eg, drug tablet return, laboratory tests)                                                                                                                                                                                                                              | 17                                |
| 26 |                                                           |     |                                                                                                                                                                                                                                                                                                                                                                                |                                   |
| 27 |                                                           |     |                                                                                                                                                                                                                                                                                                                                                                                |                                   |
| 28 |                                                           | 11d | Relevant concomitant care and interventions that are permitted or prohibited during the trial                                                                                                                                                                                                                                                                                  | 14                                |
| 29 |                                                           |     |                                                                                                                                                                                                                                                                                                                                                                                |                                   |
| 30 | Outcomes                                                  | 12  | Primary, secondary, and other outcomes, including the specific measurement variable (eg, systolic blood pressure), analysis metric (eg, change from baseline, final value, time to event), method of aggregation (eg, median, proportion), and time point for each outcome. Explanation of the clinical relevance of chosen efficacy and harm outcomes is strongly recommended | 10-13; Figure 1                   |
| 31 |                                                           |     |                                                                                                                                                                                                                                                                                                                                                                                |                                   |
| 32 |                                                           |     |                                                                                                                                                                                                                                                                                                                                                                                |                                   |
| 33 |                                                           |     |                                                                                                                                                                                                                                                                                                                                                                                |                                   |
| 34 | Participant timeline                                      | 13  | Time schedule of enrolment, interventions (including any run-ins and washouts), assessments, and visits for participants. A schematic diagram is highly recommended (see Figure)                                                                                                                                                                                               | Figure 1                          |
| 35 |                                                           |     |                                                                                                                                                                                                                                                                                                                                                                                |                                   |
| 36 |                                                           |     |                                                                                                                                                                                                                                                                                                                                                                                |                                   |
| 37 | Sample size                                               | 14  | Estimated number of participants needed to achieve study objectives and how it was determined, including clinical and statistical assumptions supporting any sample size calculations                                                                                                                                                                                          | 7; 8                              |
| 38 |                                                           |     |                                                                                                                                                                                                                                                                                                                                                                                |                                   |
| 39 |                                                           |     |                                                                                                                                                                                                                                                                                                                                                                                |                                   |
| 40 |                                                           |     |                                                                                                                                                                                                                                                                                                                                                                                |                                   |
| 41 |                                                           |     |                                                                                                                                                                                                                                                                                                                                                                                |                                   |
| 42 |                                                           |     |                                                                                                                                                                                                                                                                                                                                                                                |                                   |
| 43 |                                                           |     |                                                                                                                                                                                                                                                                                                                                                                                |                                   |
| 44 |                                                           |     |                                                                                                                                                                                                                                                                                                                                                                                |                                   |
| 45 |                                                           |     |                                                                                                                                                                                                                                                                                                                                                                                |                                   |
| 46 |                                                           |     |                                                                                                                                                                                                                                                                                                                                                                                |                                   |

|    |                                                                     |     |                                                                                                                                                                                                                                                                                                                                                                                                              |        |
|----|---------------------------------------------------------------------|-----|--------------------------------------------------------------------------------------------------------------------------------------------------------------------------------------------------------------------------------------------------------------------------------------------------------------------------------------------------------------------------------------------------------------|--------|
| 1  |                                                                     |     |                                                                                                                                                                                                                                                                                                                                                                                                              |        |
| 2  |                                                                     |     |                                                                                                                                                                                                                                                                                                                                                                                                              |        |
| 3  |                                                                     |     |                                                                                                                                                                                                                                                                                                                                                                                                              |        |
| 4  | Recruitment                                                         | 15  | Strategies for achieving adequate participant enrolment to reach target sample size                                                                                                                                                                                                                                                                                                                          | 8      |
| 5  | <b>Methods: Assignment of interventions (for controlled trials)</b> |     |                                                                                                                                                                                                                                                                                                                                                                                                              |        |
| 6  | <b>Allocation:</b>                                                  |     |                                                                                                                                                                                                                                                                                                                                                                                                              |        |
| 7  | Allocation:                                                         |     |                                                                                                                                                                                                                                                                                                                                                                                                              |        |
| 8  |                                                                     |     |                                                                                                                                                                                                                                                                                                                                                                                                              |        |
| 9  | Sequence generation                                                 | 16a | Method of generating the allocation sequence (eg, computer-generated random numbers), and list of any factors for stratification. To reduce predictability of a random sequence, details of any planned restriction (eg, blocking) should be provided in a separate document that is unavailable to those who enrol participants or assign interventions                                                     | 8      |
| 10 |                                                                     |     |                                                                                                                                                                                                                                                                                                                                                                                                              |        |
| 11 |                                                                     |     |                                                                                                                                                                                                                                                                                                                                                                                                              |        |
| 12 |                                                                     |     |                                                                                                                                                                                                                                                                                                                                                                                                              |        |
| 13 |                                                                     |     |                                                                                                                                                                                                                                                                                                                                                                                                              |        |
| 14 | Allocation concealment mechanism                                    | 16b | Mechanism of implementing the allocation sequence (eg, central telephone; sequentially numbered, opaque, sealed envelopes), describing any steps to conceal the sequence until interventions are assigned                                                                                                                                                                                                    | 8      |
| 15 |                                                                     |     |                                                                                                                                                                                                                                                                                                                                                                                                              |        |
| 16 |                                                                     |     |                                                                                                                                                                                                                                                                                                                                                                                                              |        |
| 17 |                                                                     |     |                                                                                                                                                                                                                                                                                                                                                                                                              |        |
| 18 | Implementation                                                      | 16c | Who will generate the allocation sequence, who will enrol participants, and who will assign participants to interventions                                                                                                                                                                                                                                                                                    | 8      |
| 19 |                                                                     |     |                                                                                                                                                                                                                                                                                                                                                                                                              |        |
| 20 | Blinding (masking)                                                  | 17a | Who will be blinded after assignment to interventions (eg, trial participants, care providers, outcome assessors, data analysts), and how                                                                                                                                                                                                                                                                    | 8      |
| 21 |                                                                     |     |                                                                                                                                                                                                                                                                                                                                                                                                              |        |
| 22 |                                                                     |     |                                                                                                                                                                                                                                                                                                                                                                                                              |        |
| 23 |                                                                     | 17b | If blinded, circumstances under which unblinding is permissible, and procedure for revealing a participant's allocated intervention during the trial                                                                                                                                                                                                                                                         | 8      |
| 24 |                                                                     |     |                                                                                                                                                                                                                                                                                                                                                                                                              |        |
| 25 |                                                                     |     |                                                                                                                                                                                                                                                                                                                                                                                                              |        |
| 26 | <b>Methods: Data collection, management, and analysis</b>           |     |                                                                                                                                                                                                                                                                                                                                                                                                              |        |
| 27 |                                                                     |     |                                                                                                                                                                                                                                                                                                                                                                                                              |        |
| 28 | Data collection methods                                             | 18a | Plans for assessment and collection of outcome, baseline, and other trial data, including any related processes to promote data quality (eg, duplicate measurements, training of assessors) and a description of study instruments (eg, questionnaires, laboratory tests) along with their reliability and validity, if known. Reference to where data collection forms can be found, if not in the protocol | 9-13   |
| 29 |                                                                     |     |                                                                                                                                                                                                                                                                                                                                                                                                              |        |
| 30 |                                                                     |     |                                                                                                                                                                                                                                                                                                                                                                                                              |        |
| 31 |                                                                     |     |                                                                                                                                                                                                                                                                                                                                                                                                              |        |
| 32 |                                                                     |     |                                                                                                                                                                                                                                                                                                                                                                                                              |        |
| 33 |                                                                     | 18b | Plans to promote participant retention and complete follow-up, including list of any outcome data to be collected for participants who discontinue or deviate from intervention protocols                                                                                                                                                                                                                    | 13; 17 |
| 34 |                                                                     |     |                                                                                                                                                                                                                                                                                                                                                                                                              |        |
| 35 |                                                                     |     |                                                                                                                                                                                                                                                                                                                                                                                                              |        |
| 36 | Data management                                                     | 19  | Plans for data entry, coding, security, and storage, including any related processes to promote data quality (eg, double data entry; range checks for data values). Reference to where details of data management procedures can be found, if not in the protocol                                                                                                                                            | 8      |
| 37 |                                                                     |     |                                                                                                                                                                                                                                                                                                                                                                                                              |        |
| 38 |                                                                     |     |                                                                                                                                                                                                                                                                                                                                                                                                              |        |
| 39 |                                                                     |     |                                                                                                                                                                                                                                                                                                                                                                                                              |        |
| 40 |                                                                     |     |                                                                                                                                                                                                                                                                                                                                                                                                              |        |
| 41 |                                                                     |     |                                                                                                                                                                                                                                                                                                                                                                                                              |        |
| 42 |                                                                     |     |                                                                                                                                                                                                                                                                                                                                                                                                              |        |
| 43 |                                                                     |     |                                                                                                                                                                                                                                                                                                                                                                                                              |        |
| 44 |                                                                     |     |                                                                                                                                                                                                                                                                                                                                                                                                              |        |
| 45 |                                                                     |     |                                                                                                                                                                                                                                                                                                                                                                                                              |        |
| 46 |                                                                     |     |                                                                                                                                                                                                                                                                                                                                                                                                              |        |



|    |                                 |     |                                                                                                                                                                                                                                                                                                                                       |                |
|----|---------------------------------|-----|---------------------------------------------------------------------------------------------------------------------------------------------------------------------------------------------------------------------------------------------------------------------------------------------------------------------------------------|----------------|
| 1  |                                 |     |                                                                                                                                                                                                                                                                                                                                       |                |
| 2  |                                 |     |                                                                                                                                                                                                                                                                                                                                       |                |
| 3  |                                 |     |                                                                                                                                                                                                                                                                                                                                       |                |
| 4  | Statistical methods             | 20a | Statistical methods for analysing primary and secondary outcomes. Reference to where other details of the statistical analysis plan can be found, if not in the protocol                                                                                                                                                              | 17-19          |
| 5  |                                 |     |                                                                                                                                                                                                                                                                                                                                       |                |
| 6  |                                 | 20b | Methods for any additional analyses (eg, subgroup and adjusted analyses)                                                                                                                                                                                                                                                              | 19             |
| 7  |                                 |     |                                                                                                                                                                                                                                                                                                                                       |                |
| 8  |                                 | 20c | Definition of analysis population relating to protocol non-adherence (eg, as randomised analysis), and any statistical methods to handle missing data (eg, multiple imputation)                                                                                                                                                       | 19             |
| 9  |                                 |     |                                                                                                                                                                                                                                                                                                                                       |                |
| 10 |                                 |     |                                                                                                                                                                                                                                                                                                                                       |                |
| 11 | <b>Methods: Monitoring</b>      |     |                                                                                                                                                                                                                                                                                                                                       |                |
| 12 |                                 |     |                                                                                                                                                                                                                                                                                                                                       |                |
| 13 | Data monitoring                 | 21a | Composition of data monitoring committee (DMC); summary of its role and reporting structure; statement of whether it is independent from the sponsor and competing interests; and reference to where further details about its charter can be found, if not in the protocol. Alternatively, an explanation of why a DMC is not needed | Not applicable |
| 14 |                                 |     |                                                                                                                                                                                                                                                                                                                                       |                |
| 15 |                                 | 21b | Description of any interim analyses and stopping guidelines, including who will have access to these interim results and make the final decision to terminate the trial                                                                                                                                                               | 8              |
| 16 |                                 |     |                                                                                                                                                                                                                                                                                                                                       |                |
| 17 |                                 |     |                                                                                                                                                                                                                                                                                                                                       |                |
| 18 |                                 |     |                                                                                                                                                                                                                                                                                                                                       |                |
| 19 |                                 |     |                                                                                                                                                                                                                                                                                                                                       |                |
| 20 | Harms                           | 22  | Plans for collecting, assessing, reporting, and managing solicited and spontaneously reported adverse events and other unintended effects of trial interventions or trial conduct                                                                                                                                                     | 13             |
| 21 |                                 |     |                                                                                                                                                                                                                                                                                                                                       |                |
| 22 |                                 |     |                                                                                                                                                                                                                                                                                                                                       |                |
| 23 | Auditing                        | 23  | Frequency and procedures for auditing trial conduct, if any, and whether the process will be independent from investigators and the sponsor                                                                                                                                                                                           | Not applicable |
| 24 |                                 |     |                                                                                                                                                                                                                                                                                                                                       |                |
| 25 |                                 |     |                                                                                                                                                                                                                                                                                                                                       |                |
| 26 |                                 |     |                                                                                                                                                                                                                                                                                                                                       |                |
| 27 | <b>Ethics and dissemination</b> |     |                                                                                                                                                                                                                                                                                                                                       |                |
| 28 |                                 |     |                                                                                                                                                                                                                                                                                                                                       |                |
| 29 | Research ethics approval        | 24  | Plans for seeking research ethics committee/institutional review board (REC/IRB) approval                                                                                                                                                                                                                                             | 20             |
| 30 |                                 |     |                                                                                                                                                                                                                                                                                                                                       |                |
| 31 | Protocol amendments             | 25  | Plans for communicating important protocol modifications (eg, changes to eligibility criteria, outcomes, analyses) to relevant parties (eg, investigators, REC/IRBs, trial participants, trial registries, journals, regulators)                                                                                                      | 21             |
| 32 |                                 |     |                                                                                                                                                                                                                                                                                                                                       |                |
| 33 |                                 |     |                                                                                                                                                                                                                                                                                                                                       |                |
| 34 |                                 |     |                                                                                                                                                                                                                                                                                                                                       |                |
| 35 | Consent or assent               | 26a | Who will obtain informed consent or assent from potential trial participants or authorised surrogates, and how (see Item 32)                                                                                                                                                                                                          | 20             |
| 36 |                                 |     |                                                                                                                                                                                                                                                                                                                                       |                |
| 37 |                                 |     |                                                                                                                                                                                                                                                                                                                                       |                |
| 38 |                                 | 26b | Additional consent provisions for collection and use of participant data and biological specimens in ancillary studies, if applicable                                                                                                                                                                                                 | 20             |
| 39 |                                 |     |                                                                                                                                                                                                                                                                                                                                       |                |
| 40 |                                 |     |                                                                                                                                                                                                                                                                                                                                       |                |
| 41 |                                 |     |                                                                                                                                                                                                                                                                                                                                       |                |
| 42 |                                 |     |                                                                                                                                                                                                                                                                                                                                       |                |
| 43 |                                 |     |                                                                                                                                                                                                                                                                                                                                       |                |
| 44 |                                 |     |                                                                                                                                                                                                                                                                                                                                       |                |
| 45 |                                 |     |                                                                                                                                                                                                                                                                                                                                       |                |
| 46 |                                 |     |                                                                                                                                                                                                                                                                                                                                       |                |

|    |                               |     |                                                                                                                                                                                                                                                                                     |                                          |
|----|-------------------------------|-----|-------------------------------------------------------------------------------------------------------------------------------------------------------------------------------------------------------------------------------------------------------------------------------------|------------------------------------------|
| 1  |                               |     |                                                                                                                                                                                                                                                                                     |                                          |
| 2  |                               |     |                                                                                                                                                                                                                                                                                     |                                          |
| 3  |                               |     |                                                                                                                                                                                                                                                                                     |                                          |
| 4  | Confidentiality               | 27  | How personal information about potential and enrolled participants will be collected, shared, and maintained in order to protect confidentiality before, during, and after the trial                                                                                                | 20                                       |
| 5  |                               |     |                                                                                                                                                                                                                                                                                     |                                          |
| 6  | Declaration of interests      | 28  | Financial and other competing interests for principal investigators for the overall trial and each study site                                                                                                                                                                       | 21                                       |
| 7  |                               |     |                                                                                                                                                                                                                                                                                     |                                          |
| 8  |                               |     |                                                                                                                                                                                                                                                                                     |                                          |
| 9  | Access to data                | 29  | Statement of who will have access to the final trial dataset, and disclosure of contractual agreements that limit such access for investigators                                                                                                                                     | 20                                       |
| 10 |                               |     |                                                                                                                                                                                                                                                                                     |                                          |
| 11 |                               |     |                                                                                                                                                                                                                                                                                     |                                          |
| 12 | Ancillary and post-trial care | 30  | Provisions, if any, for ancillary and post-trial care, and for compensation to those who suffer harm from trial participation                                                                                                                                                       | 20                                       |
| 13 |                               |     |                                                                                                                                                                                                                                                                                     |                                          |
| 14 |                               |     |                                                                                                                                                                                                                                                                                     |                                          |
| 15 | Dissemination policy          | 31a | Plans for investigators and sponsor to communicate trial results to participants, healthcare professionals, the public, and other relevant groups (eg, via publication, reporting in results databases, or other data sharing arrangements), including any publication restrictions | 20                                       |
| 16 |                               |     |                                                                                                                                                                                                                                                                                     |                                          |
| 17 |                               |     |                                                                                                                                                                                                                                                                                     |                                          |
| 18 |                               |     |                                                                                                                                                                                                                                                                                     |                                          |
| 19 |                               | 31b | Authorship eligibility guidelines and any intended use of professional writers                                                                                                                                                                                                      | Not applicable                           |
| 20 |                               |     |                                                                                                                                                                                                                                                                                     |                                          |
| 21 |                               | 31c | Plans, if any, for granting public access to the full protocol, participant-level dataset, and statistical code                                                                                                                                                                     | Not applicable                           |
| 22 |                               |     |                                                                                                                                                                                                                                                                                     |                                          |
| 23 |                               |     |                                                                                                                                                                                                                                                                                     |                                          |
| 24 | <b>Appendices</b>             |     |                                                                                                                                                                                                                                                                                     |                                          |
| 25 |                               |     |                                                                                                                                                                                                                                                                                     |                                          |
| 26 | Informed consent materials    | 32  | Model consent form and other related documentation given to participants and authorised surrogates                                                                                                                                                                                  | Available if requested (not in protocol) |
| 27 |                               |     |                                                                                                                                                                                                                                                                                     |                                          |
| 28 |                               |     |                                                                                                                                                                                                                                                                                     |                                          |
| 29 | Biological specimens          | 33  | Plans for collection, laboratory evaluation, and storage of biological specimens for genetic or molecular analysis in the current trial and for future use in ancillary studies, if applicable                                                                                      | Not applicable                           |
| 30 |                               |     |                                                                                                                                                                                                                                                                                     |                                          |
| 31 |                               |     |                                                                                                                                                                                                                                                                                     |                                          |

\*It is strongly recommended that this checklist be read in conjunction with the SPIRIT 2013 Explanation & Elaboration for important clarification on the items. Amendments to the protocol should be tracked and dated. The SPIRIT checklist is copyrighted by the SPIRIT Group under the Creative Commons "[Attribution-NonCommercial-NoDerivs 3.0 Unported](https://creativecommons.org/licenses/by-nc-nd/3.0/)" license.
